# Supplementary material for: Designing photolabile ruthenium polypyridyl crosslinkers for hydrogel formation and multiplexed, visible-light degradation
Source: PubMed Central journal article supplement — RSC Adv. 2019 Feb 8;9(9):4942–7. doi: 10.1039/c8ra09764j (PMC6785243; doi:10.1039/c8ra09764j), 2019-02-08
Supplement: NIHMS1010872-supplement-ESI.pdf [file NIHMS1010872-supplement-ESI.pdf]

# Supplementary Information

## Designing Photolabile Ruthenium Polypyridyl Crosslinkers for Hydrogel Formation and Multiplexed, Visible-light Degradation

Teresa L. Rapp, Yanfei Wang, Maegan A. Delessio, Michael R. Gau, and Ivan J. Dmochowski

|                                                                                                                                              |    |
|----------------------------------------------------------------------------------------------------------------------------------------------|----|
| Experimental Procedures .....                                                                                                                | 2  |
| Materials .....                                                                                                                              | 2  |
| Methods .....                                                                                                                                | 2  |
| Formation of 10 wt% PEG hydrogel.....                                                                                                        | 5  |
| Figure S1 – Stability of 3 in water .....                                                                                                    | 5  |
| Figure S2 – Photolysis of 1 and 2 .....                                                                                                      | 6  |
| Figure S3 – Photolysis of 3 with 600 – 700 nm light .....                                                                                    | 7  |
| Figure S4 – Kinetics traces for the determination of the quantum yield .....                                                                 | 7  |
| Figure S5 – Crystal structure for compound 2.....                                                                                            | 8  |
| Figure S6 – Ru(biq) <sub>2</sub> (4-pentynenitrile) <sub>2</sub> .....                                                                       | 9  |
| Figure S7 – Crystal Structure Determination of 3 .....                                                                                       | 10 |
| Table S7.1. Summary of Structure Determination of Compound 3 .....                                                                           | 11 |
| Table S7.2 . Refined Positional Parameters .....                                                                                             | 11 |
| Table S7.3. Positional Parameters for Hydrogens in Compound 3 .....                                                                          | 15 |
| Table S7.4 . Bond Distances in Compound 3 .....                                                                                              | 17 |
| Table S7.5. Bond Angles in Compound 3 .....                                                                                                  | 18 |
| Figure S8 – Crystal Structure Determination of Ru(biq)(bpy)(5-hexynenitrile) <sub>2</sub> [PF <sub>6</sub> ] <sub>2</sub> .....              | 21 |
| Table S8.1. Summary of Structure Determination of Ru(biq)(bpy)(5-hexynenitrile) <sub>2</sub> [PF <sub>6</sub> ] <sub>2</sub> .....           | 22 |
| Table S8.2 . Refined Positional Parameters for Ru(biq)(bpy)(5-hexynenitrile) <sub>2</sub> [PF <sub>6</sub> ] <sub>2</sub> .....              | 22 |
| Table S8.3 . Positional Parameters for Hydrogens in Ru(biq)(bpy)(5-hexynenitrile) <sub>2</sub> [PF <sub>6</sub> ] <sub>2</sub> .....         | 24 |
| Table S8.4 . Bond Distances in Ru(biq)(bpy)(5-hexynenitrile) <sub>2</sub> [PF <sub>6</sub> ] <sub>2</sub> , Å .....                          | 25 |
| Table S8.5 . Bond Angles in Ru(biq)(bpy)(5-hexynenitrile) <sub>2</sub> [PF <sub>6</sub> ] <sub>2</sub> , ° .....                             | 26 |
| Figure S9 – Crystal Structure Determination of Ru(biq) <sub>2</sub> (4-pentynenitrile) <sub>2</sub> .....                                    | 28 |
| Table S9.1. Summary of Structure Determination of Ru(biq) <sub>2</sub> (4-pentynenitrile) <sub>2</sub> [PF <sub>6</sub> ] <sub>2</sub> ..... | 29 |

|                                                      |    |
|------------------------------------------------------|----|
| Table S9.2. Refined Positional Parameters .....      | 30 |
| Table S9.3. Positional Parameters for Hydrogens..... | 31 |
| Table S9.4. Refined Thermal Parameters (U's).....    | 33 |
| Table S9.5. Bond Distances, Å .....                  | 35 |
| Table S9.6. Bond Angles, ° .....                     | 36 |

## Experimental Procedures

### *Materials*

Ru(bpy)<sub>2</sub>Cl<sub>2</sub> was purchased from Strem Chemicals; LiCl, CD<sub>3</sub>CN, biquinoline, NH<sub>4</sub>PF<sub>6</sub>, RuCl<sub>3</sub>, AgOTf, AgPF<sub>6</sub>, and hydroquinone were purchased from Acros Organics; 4-pentynenitrile, 5-hexynenitrile, sodium ascorbate, copper sulfate and the Amberlite resins were purchased from Sigma Aldrich, and all solvents were purchased from Fisher Scientific. All chemicals were used without further purification.

Azido-PEG was purchased from PegWorks, THPTA from Click Chemistry Tools, PBS was purchased from Hyclone.

### *Methods*

*Synthesis of Ru(bpy)<sub>2</sub>(4-hexynenitrile)<sub>2</sub> (1)* Ru(bpy)<sub>2</sub>Cl<sub>2</sub> (106.1 mg, 0.20 mmol) and silver triflate (AgOTf, 112 mg, 0.43 mmol) were suspended in methanol (15 mL) and stirred for 10 min. 5-hexynenitrile (178 μL, 2 mmol) was added and the reaction was heated to 50 °C for 1 h. The methanol was removed by rotary evaporation and NH<sub>4</sub>PF<sub>6</sub> was added to precipitate the PF<sub>6</sub> salt of **1**, which was extracted using dichloromethane. The product was purified by flash chromatography on silica gel with a gradient of 1:4 acetonitrile:DCM. The nitrate salt was generated by passage through an Amberlite IRA 743 Free Base resin pre-soaked overnight in HNO<sub>3</sub> with methanol as the eluent; Yield: 100.6 mg, 68%. <sup>1</sup>H NMR (CD<sub>3</sub>CN): 9.272 (d, 2H), 8.5144 (d, 2H), 8.3725 (d, 2H), 8.2741 (t, 2H), 7.9551 (t, 2H), 7.8510 (t, 2H),

7.6191 (d, 2H), 7.2636 (t, 2H), 2.7542 (m, 4H), 2.1804 (t, 2H), 2.0517 (m, 4H), 1.7048 (t, 4H). Expected Mass: 662.1462 ( $[1]^{2+}[\text{NO}_3^-]$ ), observed mass: 662.1449 Da

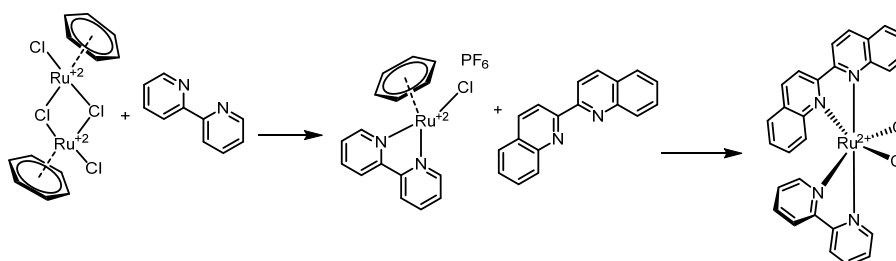

*Synthesis of Ru(bpy)(biq)Cl<sub>2</sub>* Bis[(benzene)dichlororuthenium] (530 mg, 1.06 mmol) and 2,2'-bipyridine (413 mg, 2.6 mmol) were added to methanol (50 mL). The solution was stirred at room temperature for 1 h, then tetrabutylammonium hexafluorophosphate (TBAPF<sub>6</sub>) was added until precipitation was complete (~200 mg). The light-yellow product Ru(bz)(bpy)Cl was isolated by vacuum filtration and used without further purification for the next step (crude yield: 908 mg, 83%).

Ru(bz)(bpy)Cl[PF<sub>6</sub>] (908 mg, 1.76 mmol) and LiCl (612 mg, 14.4 mmol) were suspended in DMF (7 mL) and stirred under nitrogen for 10 min. Biquinoline (433 mg, 1.70 mmol) was added, and the solution heated to 130 °C for 1 h. The reaction mixture was cooled to room temperature and added to 500 mL DI water and filtered to collect the dark green product. The precipitate was then redissolved in dichloromethane and washed 2x with water and reprecipitated from diethyl ether for the final product, Ru(bpy)(biq)Cl<sub>2</sub> (614 mg, 55% overall yield).

*Synthesis of Ru(bpy)(biq)(5-hexynenitrile)<sub>2</sub>[NO<sub>3</sub>]<sub>2</sub> (2)* The same procedure for **1** was used:

Ru(bpy)(biq)Cl<sub>2</sub> (23.4 mg, 0.04 mmol), AgOTf (23 mg, 0.09 mmol), and 5-hexynenitrile (47 μL, 0.54 mmol) dissolved in methanol (10 mL), purified by silica gel chromatography (1:4 acetonitrile:DCM).

Final yield: 16.6 mg, 63% yield. The water-soluble nitrate salt was generated by passage through an Amberlite IRA 743 Free Base resin presoaked in HNO<sub>3</sub> with methanol as the eluent. <sup>1</sup>H NMR (CD<sub>3</sub>CN): 9.5661 (d, 1H), 8.8821 (d, 1H), 8.8529 (d, 1H), 8.4770 (s, 2H), 8.2544 (t, 2H), 8.2384 (t, 2H), 8.1190 (d, 2H), 8.0490 (t, 2H), 7.9412 (m, 4H), 7.0770 (t, 2H), 7.5757 (t, 1H), 7.4435 (d, 1H), 7.3378 (m, 3H),

7.2118 (t, 2H), 3.691 (s, 1H), 3.7054 (s, 1H), 2.9442 (t, 2H), 2.7941 (t, 2H), 2.4730 (m, 2H), 2.3016 (m, 2H). Expected mass: 734.1464 ( $[2]^{2+}[\text{NO}_3^-]$ ), observed mass: 734.1473 Da

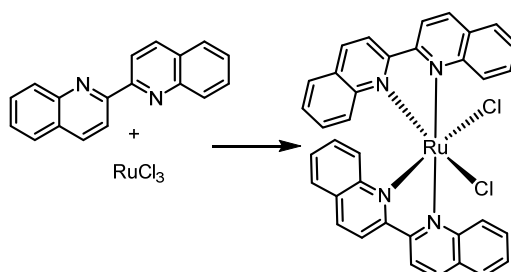

*Synthesis of Ru(biq)<sub>2</sub>Cl<sub>2</sub>* RuCl<sub>3</sub> (207 mg, 1 mmol), hydroquinone (222 mg, 2 mmol), and LiCl (240 mg, 5 mmol) were suspended in DMF (5 mL) and stirred under nitrogen for 15 min. Biquinoline (498 mg, 1.9 mmol) was added and the reaction heated to 130 °C for 1 h. The reaction mixture was added to 500 mL DI water and product isolated following the same procedure as Ru(bpy)(biq)Cl<sub>2</sub>. Yield: 219 mg, 33%.

*Synthesis of Ru(biq)<sub>2</sub>(5-hexynenitrile)<sub>2</sub>[NO<sub>3</sub>]<sub>2</sub> (3)* Ru(biq)<sub>2</sub>Cl<sub>2</sub> from previous step (100 mg, 0.15 mmol) was dissolved in 10 mL of methanol. AgPF<sub>6</sub> (105 mg, 0.4 mmol) was added, reaction was stirred at room temperature for 10 min. 5-hexynenitrile (230 μL, 2.8 mmol) was added and solution was heated to 50 °C for 1 h. Ru(biq)<sub>2</sub>(5-hexynenitrile)<sub>2</sub>[PF<sub>6</sub>]<sub>2</sub> was extracted and purified as described for **1** (45.3 mg, 73%). The nitrate salt was generated using Amberlite IRA 743 Free Base resin as described for **1**. Yield: 97.9 mg, 73%. <sup>1</sup>H NMR (D<sub>2</sub>O): 9.3868 (s, 2H), 8.7955 (d, 2H), 8.4220 (m, 6H), 8.2398 (d, 2H), 8.1253 (t, 2H), 8.1097 (s, 2H), 7.9900 (d, 2H), 7.5695 (t, 2H), 6.9401 (t, 2H), 6.8261 (d, 2H), 6.8261 (d, 2H), 3.0657 (m, 4H), 2.1894 (t, 2H), 2.0125 (m, 4H), 1.7317 (m, 4H). Expected mass: 862.2093 ( $[5]^{2+}[\text{NO}_3^-]$ ), observed mass: 862.2095 Da

*Synthesis of Ru(biq)<sub>2</sub>(4-pentynenitrile)<sub>2</sub>[NO<sub>3</sub>]<sub>2</sub>* was synthesized according to the protocol for **3**; with Ru(biq)<sub>2</sub>(Cl)<sub>2</sub> (51 mg, 0.07 mmol), AgPF<sub>6</sub> (49 mg, 0.19 mmol), and 4-pentynenitrile (78 μL, 0.74 mmol). Yield: (45.3 mg, 73%). <sup>1</sup>H NMR (CD<sub>3</sub>CN): 9.1485 (1H), 8.6791 (d, 2H), 8.3620 (d, 2H), 8.2986 (d, 2H), 8.2057 (s, 2H), 8.0071 (t, 2H), 8.050 (s, 2H), 7.9136 (d, 2H), 7.4970 (t, 1H), 6.8676 (t, 1H), 6.8165 (d,

2H), 2.8483 (m, 4H), 2.3369 (m, 4H), 1.8338 (t, 2H). Expected mass: 834.1779 ( $[\mathbf{3}]^{2+}[\text{NO}_3^-]$ ), observed mass: 834.1799 Da

### Formation of 10 wt% PEG hydrogel

Table S1 shows the amounts of reagents used to generate a 25  $\mu\text{L}$  hydrogel

|           | [Stock]   | Amt to add ( $\mu\text{L}$ ) | Ratio (X:RuAlkyne) |
|-----------|-----------|------------------------------|--------------------|
| PEG       | 600 mg/mL | 4.17                         | 0.5:1              |
| RuAlkyne  | 50 mM     | 9.84                         | 1                  |
| Ascorbate | 2500 mM   | 2.6                          | 10:1               |
| THPTA     | 1000 mM   | 4.92                         | 10:1               |
| Cu        | 1.5 M     | 3.28                         | 10:1               |
| MeCN      |           | 0.25                         |                    |
| Total     |           | 25.00                        |                    |

PEG, ascorbate, and RuAlkyne were mixed together, and the  $\text{CuSO}_4$  and THPTA were mixed separately to allow the THPTA to fully coordinate the copper. The two solutions were then combined and mixed thoroughly before being allowed to gel over the course of 5-10 min. Hydrogels were then soaked in PBS to remove any excess ruthenium and copper before any experiments were done.

### Figure S1 – Stability of **3** in water

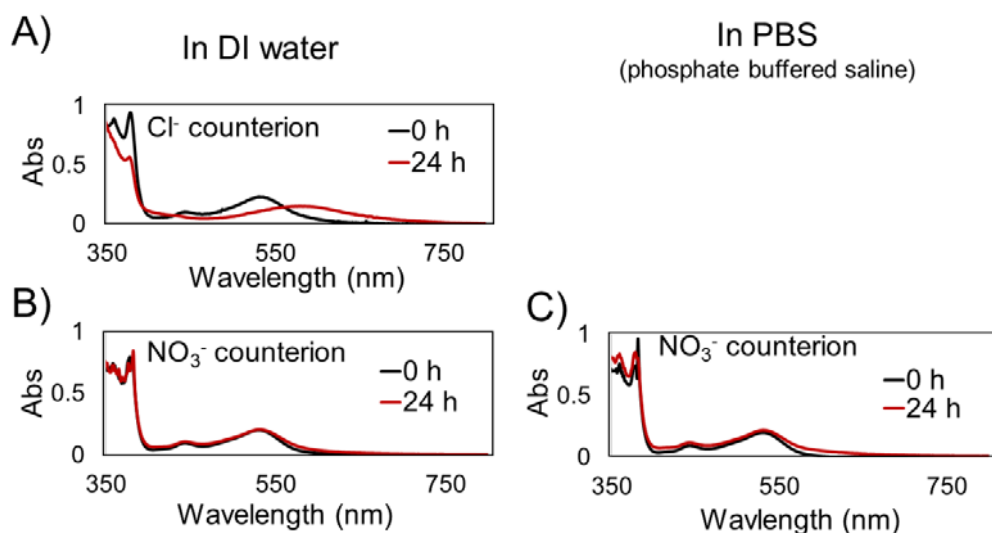

**Figure S1.** The  $\text{NO}_3^-$  salt of **3** was stable in both water and biologically relevant PBS. The chloride salt of the same compound showed remarkably decreased stability, perhaps owing to the protective nature of the nitrate anion.

**Figure S2 – Photolysis of 1 and 2**

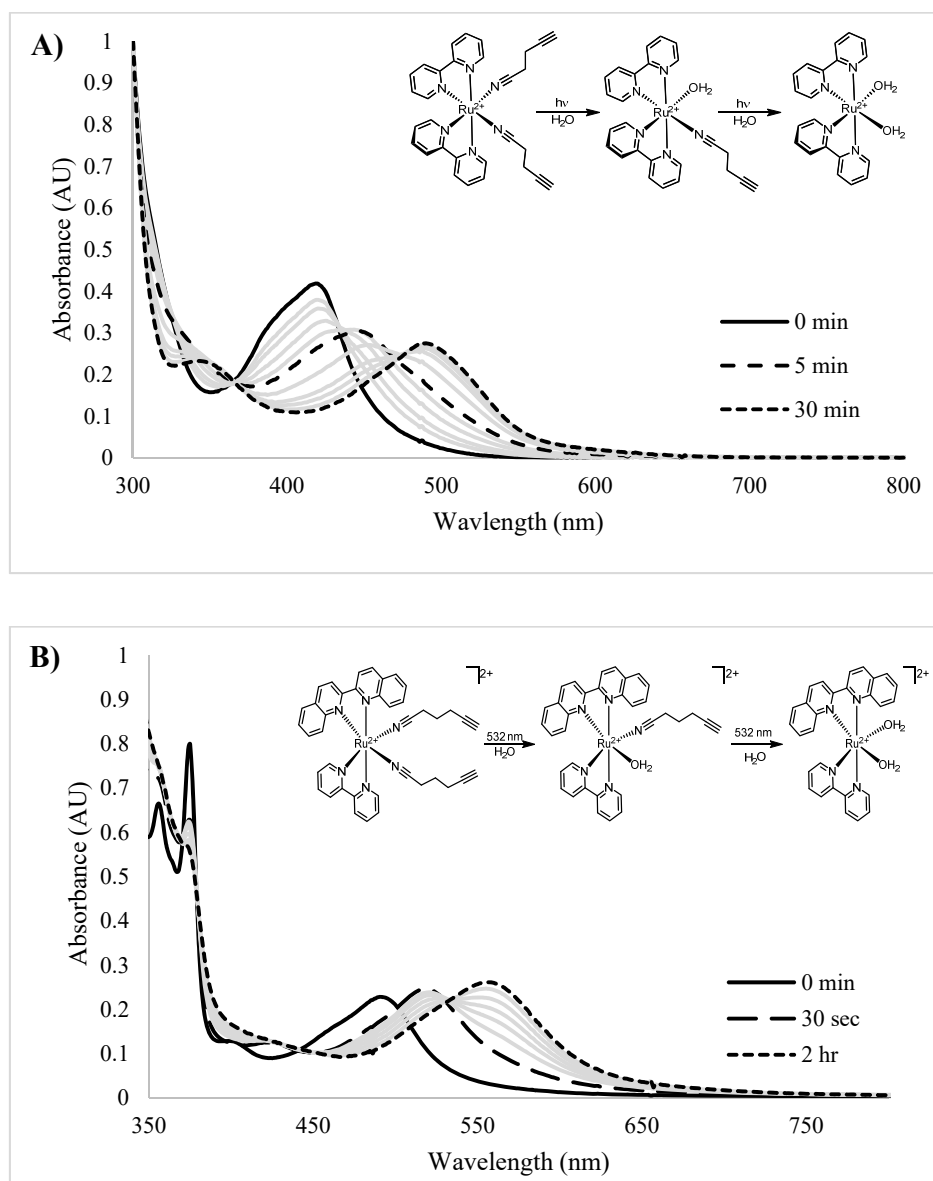

**Figure S2.** Photolysis of 1 and 2 in water. A) 65  $\mu\text{M}$  1 in water, irradiated with a 450 nm laser pointer (52 mW/cm<sup>2</sup>). B) 65  $\mu\text{M}$  2 in water, irradiated with 523 nm LED (25 mW/cm<sup>2</sup>).

**Figure S3 – Photolysis of 3 with 600 – 700 nm light**

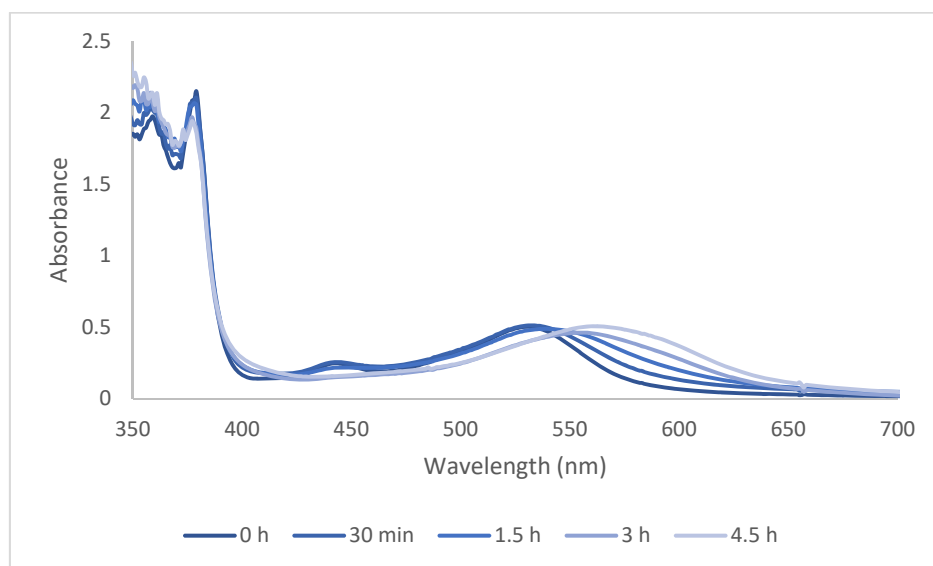

**Figure S3.** 80  $\mu\text{M}$  solution of **3** ( $\text{Ru}(\text{biq})_2(5\text{-hexynitrile})_2$ ) in water, irradiated with broadband 600 – 700 nm incandescent light ( $5 \text{ mW}/\text{cm}^2$ ).

**Figure S4 – Kinetics traces for the determination of the quantum yield**

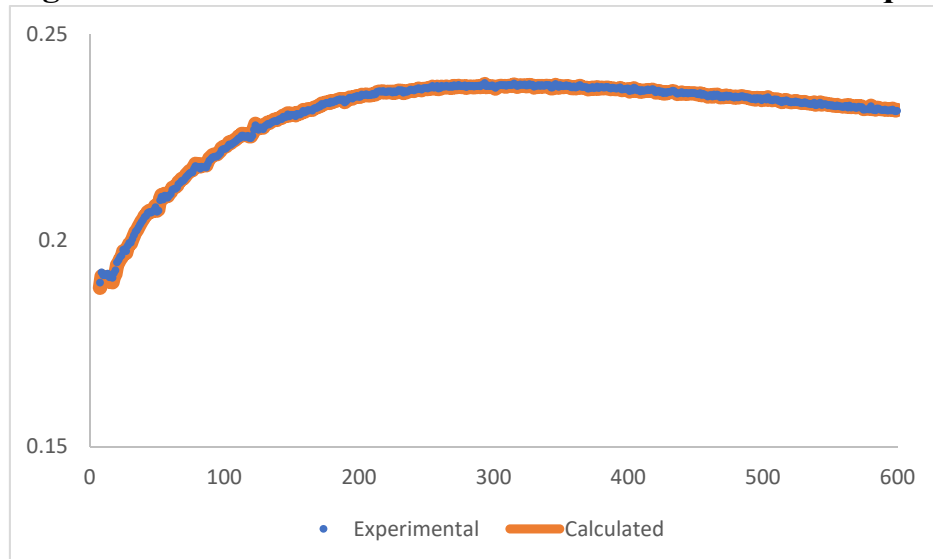

**Figure S4.** Kinetics trace for **3** under constant photolysis. The absorbance was measured at 565 nm throughout the experiment. The data were fit to an equation of the form

$$y = A_1 e^{-x/\tau_1} + A_2 e^{-x/\tau_2} + y_0$$

With two time constants  $\tau_1$  and  $\tau_2$  that give rate constants  $k_1$  and  $k_2$  according to

$$\text{Abs}@470 = \varepsilon_A[A]_0 e^{-k_1 t} - \varepsilon_B[A]_0 e^{-k_2 t} + \varepsilon_B[A]_0$$

The rate constants for each step for **1-3**:

|                                                             | $\tau_1$ (s) | $k_1$ ( $s^{-1}$ ) | $\tau_2$ (s) | $k_2$ ( $s^{-1}$ ) |
|-------------------------------------------------------------|--------------|--------------------|--------------|--------------------|
| <b>1:</b> Ru(bpy) <sub>2</sub> hexynenitrile <sub>2</sub>   | 99 ± 7       | 0.01004            | 730 ± 30     | 0.0014             |
| <b>2:</b> Ru(bpy)(biq)(hexynenitrile) <sub>2</sub>          | 155 ± 15     | 0.0068             | 155 ± 15     | 0.0068             |
| <b>3:</b> Ru(biq) <sub>2</sub> (hexynenitrile) <sub>2</sub> | 131 ± 6      | 0.0076             | 1034 ± 47    | 0.00097            |

**Figure S5 – Crystal structure for compound 2**

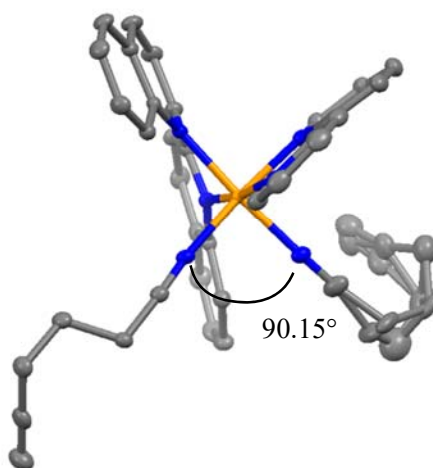

**Figure S5.** Crystal structure for **2** synthesized under longer, higher temperature reaction conditions. One 5-hexynenitrile ligand shows *cis* isomerization with 100% occupancy in the structure. The alkyne-biquinoline distance for the *cis*-hexyne was 3.734 Å, while the alkyne-biquinoline distance for the *trans*-hexyne was 6.809 Å. The *cis* product was observed after extended reaction times during the initial synthesis, and was irreversible.



### Figure S6 – Ru(biq)<sub>2</sub>(4-pentynenitrile)<sub>2</sub>

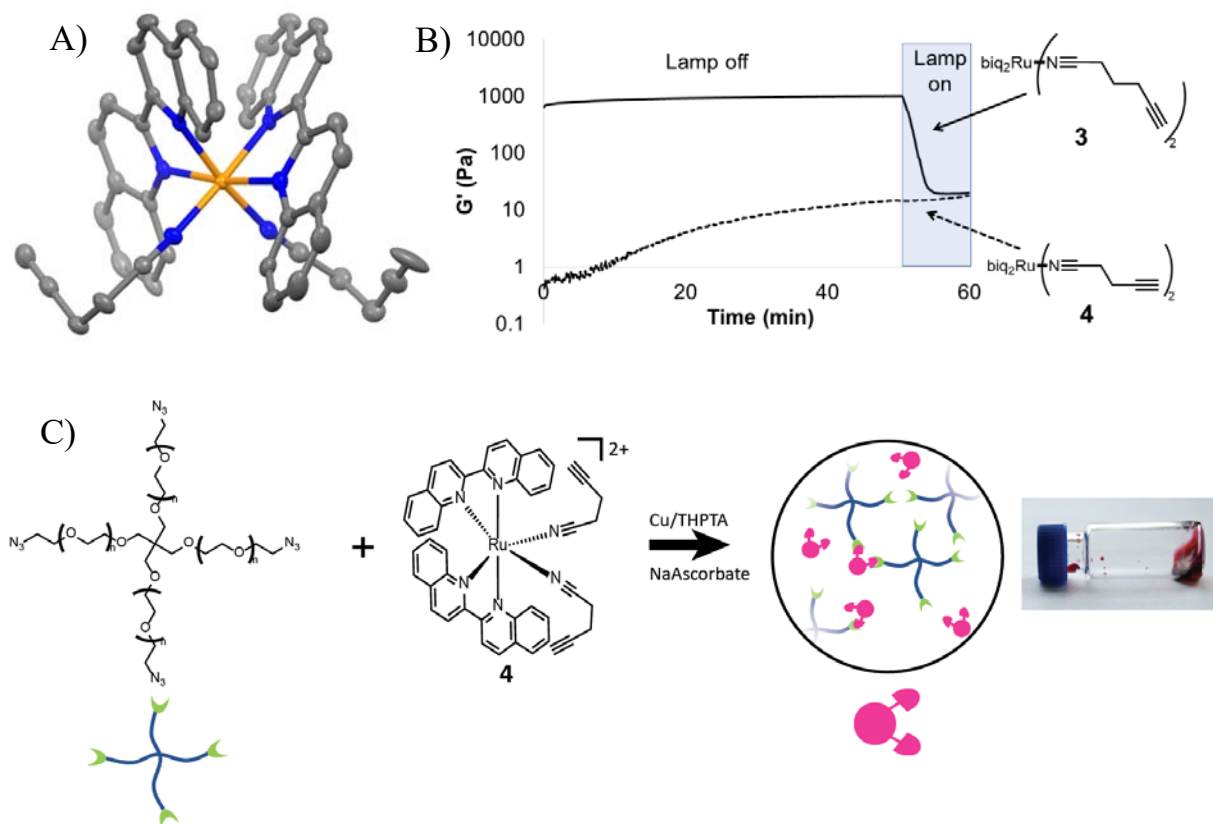

**Figure S6.** Shorter alkyne-bearing nitrile ligands led to poor gelation. A) Ru(biq)<sub>2</sub>(4-pentynenitrile)<sub>2</sub> was synthesized according to the same protocol as compounds **1-3**, but consistently produced *cis*-isomers that were incapable of forming a hydrogel. The alkyne-biq distances in this structure are only 3.867 and 4.030 Å. B) Rheometry of Ru(biq)<sub>2</sub>(4-pentynenitrile)<sub>2</sub> compared to compound **3**. Ru(biq)<sub>2</sub>(4-pentynenitrile)<sub>2</sub> never formed an elastic hydrogel material (C).

## Figure S7 – Crystal Structure Determination of 3

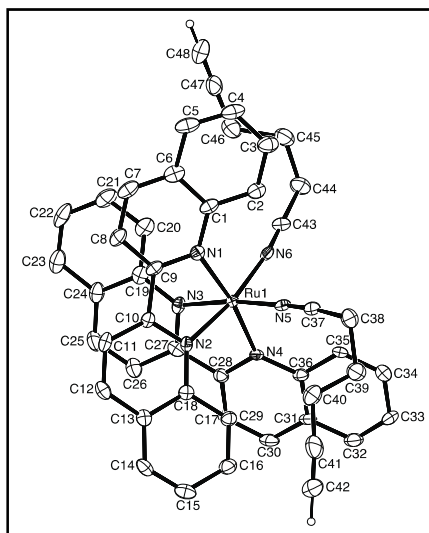

**Figure S7.1.** ORTEP drawing of molecule no.1 of the asymmetric unit with 50% thermal ellipsoids.

$\text{Ru}(\text{biq})_2(5\text{-hexynenitrile})_2[\text{PF}_6]_2$ , Compound **3**,  $\text{C}_{48}\text{H}_{38}\text{F}_{12}\text{N}_6\text{P}_2\text{Ru}$ , crystallizes in the monoclinic space group  $\text{P}2_1$  (systematic absences  $0k0: k=\text{odd}$ ) with  $a=11.3357(9)\text{\AA}$ ,  $b=31.071(3)\text{\AA}$ ,  $c=12.8113(11)\text{\AA}$ ,  $\beta=99.628(5)^\circ$ ,  $V=4448.7(7)\text{\AA}^3$ ,  $Z=4$ , and  $d_{\text{calc}}=1.627\text{ g/cm}^3$ . X-ray intensity data were collected on a Bruker APEXII [1] CCD area detector employing graphite-monochromated Mo-K $\alpha$  radiation ( $\lambda=0.71073\text{\AA}$ ) at a temperature of 100K. Preliminary indexing was performed from a series of thirty-six  $0.5^\circ$  rotation frames with exposures of 10 seconds. A total of 2249 frames were collected with a crystal to detector distance of 54.7 mm, rotation widths of  $0.5^\circ$  and exposures of 30 seconds:

| scan type | $2\theta$ | $\omega$ | $\phi$ | $\chi$ | Frames |
|-----------|-----------|----------|--------|--------|--------|
| $\phi$    | -33.00    | 301.86   | 19.62  | 43.59  | 739    |
| $\phi$    | 29.50     | 108.32   | 6.43   | -46.47 | 611    |
| $\omega$  | 34.50     | 311.98   | 167.97 | 65.91  | 196    |
| $\omega$  | -23.00    | 321.68   | 226.55 | -73.06 | 89     |
| $\omega$  | 29.50     | 119.68   | 26.51  | -76.00 | 99     |
| $\phi$    | -33.00    | 308.05   | 27.50  | 57.63  | 510    |

Rotation frames were integrated using SAINT [2], producing a listing of unaveraged  $F^2$  and  $\sigma(F^2)$  values. A total of 59533 reflections were measured over the ranges  $3.224 \leq 2\theta \leq 55.074^\circ$ ,  $-14 \leq h \leq 14$ ,  $-40 \leq k \leq 40$ ,  $-16 \leq l \leq 16$  yielding 19666 unique reflections ( $R_{\text{int}} = 0.0541$ ). The intensity data were corrected for

Lorentz and polarization effects and for absorption using SADABS [3] (minimum and maximum transmission 0.6698, 0.7456). The structure was solved by direct methods - ShelXS-97 [4]. Refinement was by full-matrix least squares based on  $F^2$  using SHELXL-2017 [5]. All reflections were used during refinement. The weighting scheme used was  $w=1/[\sigma^2(F_o^2) + (0.0764P)^2 + 1.3878P]$  where  $P = (F_o^2 + 2F_c^2)/3$ . Non-hydrogen atoms were refined anisotropically and hydrogen atoms were refined using a riding model. Refinement converged to  $R_1=0.0525$  and  $wR_2=0.1221$  for 17036 observed reflections for which  $F > 4\sigma(F)$  and  $R_1=0.0660$  and  $wR_2=0.1322$  and  $GOF = 1.067$  for all 19666 unique, non-zero reflections and 1243 variables. The maximum  $\Delta/\sigma$  in the final cycle of least squares was 0.001 and the two most prominent peaks in the final difference Fourier were +1.63 and -0.79  $e/\text{\AA}^3$ .

Table S7.1. lists cell information, data collection parameters, and refinement data. Final positional parameters are given in Tables S7.2. Anisotropic thermal parameters are in Table S7.3. Tables S7.4. and S7.5. list bond distances and bond angles. Figure S7.1 is ORTEP representation of the molecule with 50% probability thermal ellipsoids displayed.

Table S7.1. Summary of Structure Determination of Compound 3

|                                         |                                                                    |
|-----------------------------------------|--------------------------------------------------------------------|
| Empirical formula                       | $C_{48}H_{38}F_{12}N_6P_2Ru$                                       |
| Formula weight                          | 1089.85                                                            |
| Temperature/K                           | 100                                                                |
| Crystal system                          | monoclinic                                                         |
| Space group                             | $P2_1$                                                             |
| a                                       | 11.3357(9) $\text{\AA}$                                            |
| b                                       | 31.071(3) $\text{\AA}$                                             |
| c                                       | 12.8113(11) $\text{\AA}$                                           |
| $\beta$                                 | 99.628(5) $^\circ$                                                 |
| Volume                                  | 4448.7(7) $\text{\AA}^3$                                           |
| Z                                       | 4                                                                  |
| $d_{\text{calc}}$                       | 1.627 $\text{g/cm}^3$                                              |
| $\mu$                                   | 0.519 $\text{mm}^{-1}$                                             |
| F(000)                                  | 2200.0                                                             |
| Crystal size, mm                        | 0.17 $\times$ 0.11 $\times$ 0.05                                   |
| 2 $\theta$ range for data collection    | 3.224 - 55.074 $^\circ$                                            |
| Index ranges                            | -14 $\leq h \leq 14$ , -40 $\leq k \leq 40$ , -16 $\leq l \leq 16$ |
| Reflections collected                   | 59533                                                              |
| Independent reflections                 | 19666[R(int) = 0.0541]                                             |
| Data/restraints/parameters              | 19666/73/1243                                                      |
| Goodness-of-fit on $F^2$                | 1.067                                                              |
| Final R indexes [ $I \geq 2\sigma(I)$ ] | $R_1 = 0.0525$ , $wR_2 = 0.1221$                                   |
| Final R indexes [all data]              | $R_1 = 0.0660$ , $wR_2 = 0.1322$                                   |
| Largest diff. peak/hole                 | 1.63/-0.79 $e/\text{\AA}^3$                                        |
| Flack parameter                         | 0.066(10)                                                          |

Table S7.2 . Refined Positional Parameters

| Atom | x          | y           | z          | U(eq)       |
|------|------------|-------------|------------|-------------|
| Ru1  | 0.31093(4) | 0.11876(2)  | 0.38528(4) | 0.01455(12) |
| N1   | 0.2676(5)  | 0.16227(19) | 0.4954(4)  | 0.0168(12)  |

|     |            |             |            |            |
|-----|------------|-------------|------------|------------|
| N2  | 0.4462(5)  | 0.1645(2)   | 0.3909(4)  | 0.0158(12) |
| N3  | 0.4401(5)  | 0.08681(19) | 0.4925(4)  | 0.0181(12) |
| N4  | 0.3828(5)  | 0.07563(19) | 0.2872(4)  | 0.0150(11) |
| N5  | 0.2012(5)  | 0.1521(2)   | 0.2726(4)  | 0.0175(12) |
| N6  | 0.1873(5)  | 0.0739(2)   | 0.4057(4)  | 0.0179(12) |
| C1  | 0.1620(6)  | 0.1658(2)   | 0.5347(5)  | 0.0206(15) |
| C2  | 0.0537(6)  | 0.1498(3)   | 0.4762(6)  | 0.0222(15) |
| C3  | -0.0503(7) | 0.1527(3)   | 0.5166(6)  | 0.0302(18) |
| C4  | -0.0509(7) | 0.1703(3)   | 0.6170(6)  | 0.0311(18) |
| C5  | 0.0508(8)  | 0.1865(3)   | 0.6753(7)  | 0.034(2)   |
| C6  | 0.1609(7)  | 0.1854(2)   | 0.6343(6)  | 0.0233(16) |
| C7  | 0.2667(7)  | 0.2030(3)   | 0.6896(6)  | 0.0296(17) |
| C8  | 0.3680(7)  | 0.2040(3)   | 0.6437(6)  | 0.0257(16) |
| C9  | 0.3650(6)  | 0.1831(2)   | 0.5442(5)  | 0.0189(14) |
| C10 | 0.4668(6)  | 0.1840(2)   | 0.4860(5)  | 0.0157(13) |
| C11 | 0.5748(7)  | 0.2049(3)   | 0.5247(6)  | 0.0230(15) |
| C12 | 0.6616(6)  | 0.2071(2)   | 0.4625(6)  | 0.0219(15) |
| C13 | 0.6414(6)  | 0.1900(2)   | 0.3581(5)  | 0.0185(14) |
| C14 | 0.7243(6)  | 0.1930(3)   | 0.2884(6)  | 0.0247(16) |
| C15 | 0.6975(7)  | 0.1774(3)   | 0.1881(6)  | 0.0265(17) |
| C16 | 0.5829(6)  | 0.1594(3)   | 0.1520(6)  | 0.0246(16) |
| C17 | 0.5006(6)  | 0.1554(2)   | 0.2166(5)  | 0.0192(15) |
| C18 | 0.5279(6)  | 0.1696(2)   | 0.3237(5)  | 0.0167(14) |
| C19 | 0.4596(6)  | 0.0892(2)   | 0.6029(5)  | 0.0211(14) |
| C20 | 0.3639(7)  | 0.0956(2)   | 0.6562(6)  | 0.0247(15) |
| C21 | 0.3845(8)  | 0.1003(3)   | 0.7643(6)  | 0.0306(17) |
| C22 | 0.4991(8)  | 0.0979(3)   | 0.8217(6)  | 0.035(2)   |
| C23 | 0.5941(8)  | 0.0903(3)   | 0.7726(6)  | 0.0325(18) |
| C24 | 0.5764(7)  | 0.0840(3)   | 0.6610(6)  | 0.0252(16) |
| C25 | 0.6713(6)  | 0.0736(3)   | 0.6040(6)  | 0.0307(18) |
| C26 | 0.6472(6)  | 0.0659(3)   | 0.4991(6)  | 0.0258(16) |
| C27 | 0.5288(6)  | 0.0724(2)   | 0.4444(6)  | 0.0213(15) |
| C28 | 0.4942(6)  | 0.0638(2)   | 0.3298(5)  | 0.0180(14) |
| C29 | 0.5715(6)  | 0.0415(2)   | 0.2714(6)  | 0.0224(15) |
| C30 | 0.5323(6)  | 0.0327(3)   | 0.1676(6)  | 0.0240(16) |
| C31 | 0.4153(6)  | 0.0435(2)   | 0.1203(5)  | 0.0200(14) |
| C32 | 0.3689(6)  | 0.0346(3)   | 0.0120(6)  | 0.0264(16) |
| C33 | 0.2545(6)  | 0.0449(3)   | -0.0295(5) | 0.0278(17) |
| C34 | 0.1784(6)  | 0.0635(3)   | 0.0347(6)  | 0.0255(16) |
| C35 | 0.2200(5)  | 0.0724(2)   | 0.1386(5)  | 0.0195(14) |
| C36 | 0.3399(6)  | 0.0638(2)   | 0.1840(5)  | 0.0171(13) |
| C37 | 0.1397(6)  | 0.1701(3)   | 0.2061(5)  | 0.0207(15) |
| C38 | 0.0716(6)  | 0.1925(3)   | 0.1140(6)  | 0.0261(16) |

|      |             |             |             |             |
|------|-------------|-------------|-------------|-------------|
| C39  | 0.1485(7)   | 0.1978(3)   | 0.0271(6)   | 0.0320(19)  |
| C40  | 0.2573(7)   | 0.2257(3)   | 0.0634(6)   | 0.0320(18)  |
| C41  | 0.3421(8)   | 0.2284(4)   | -0.0114(7)  | 0.044(2)    |
| C42  | 0.4155(8)   | 0.2307(5)   | -0.0645(7)  | 0.057(3)    |
| C43  | 0.1239(6)   | 0.0488(3)   | 0.4301(6)   | 0.0228(15)  |
| C44  | 0.0396(7)   | 0.0168(3)   | 0.4611(6)   | 0.0302(17)  |
| C45  | -0.0244(7)  | 0.0336(3)   | 0.5485(6)   | 0.0318(18)  |
| C46  | 0.0580(7)   | 0.0390(4)   | 0.6551(7)   | 0.046(3)    |
| C47  | 0.0041(7)   | 0.0613(4)   | 0.7351(6)   | 0.040(2)    |
| C48  | -0.0407(9)  | 0.0802(4)   | 0.7976(7)   | 0.051(3)    |
| P1   | 0.86894(17) | 0.05574(7)  | 0.15623(19) | 0.0300(5)   |
| F1   | 0.8935(4)   | 0.0436(2)   | 0.0405(4)   | 0.0455(13)  |
| F2   | 0.9426(5)   | 0.09927(19) | 0.1536(6)   | 0.0591(17)  |
| F3   | 0.8447(4)   | 0.0671(2)   | 0.2729(5)   | 0.0546(16)  |
| F4   | 0.7966(4)   | 0.01165(15) | 0.1589(4)   | 0.0385(12)  |
| F5   | 0.7487(4)   | 0.07959(18) | 0.1050(5)   | 0.0504(15)  |
| F6   | 0.9892(4)   | 0.03091(17) | 0.2076(4)   | 0.0349(11)  |
| P2   | 0.75523(18) | 0.20797(8)  | 0.86053(16) | 0.0300(5)   |
| F7   | 0.7256(5)   | 0.1767(2)   | 0.7626(4)   | 0.0482(14)  |
| F8   | 0.8409(5)   | 0.2346(2)   | 0.7989(5)   | 0.0523(15)  |
| F9   | 0.7877(8)   | 0.2384(3)   | 0.9602(6)   | 0.095(3)    |
| F10  | 0.6709(5)   | 0.1810(2)   | 0.9233(4)   | 0.0486(14)  |
| F11  | 0.6433(6)   | 0.2373(2)   | 0.8102(6)   | 0.0700(19)  |
| F12  | 0.8637(6)   | 0.1770(3)   | 0.9032(6)   | 0.084(2)    |
| Ru1' | 0.44114(4)  | 0.38239(2)  | 0.87854(4)  | 0.01936(13) |
| N1'  | 0.2945(5)   | 0.3407(2)   | 0.8678(5)   | 0.0229(14)  |
| N2'  | 0.4701(5)   | 0.3405(2)   | 0.7609(5)   | 0.0216(13)  |
| N3'  | 0.3585(5)   | 0.41924(19) | 0.7520(5)   | 0.0178(12)  |
| N4'  | 0.5779(5)   | 0.4230(2)   | 0.8494(5)   | 0.0188(12)  |
| N5'  | 0.5308(6)   | 0.3429(2)   | 0.9904(5)   | 0.0287(15)  |
| N6'  | 0.4013(5)   | 0.4270(2)   | 0.9843(5)   | 0.0219(14)  |
| C1'  | 0.2160(6)   | 0.3343(2)   | 0.9382(6)   | 0.0229(16)  |
| C2'  | 0.2451(7)   | 0.3486(3)   | 1.0431(6)   | 0.0294(18)  |
| C3'  | 0.1658(7)   | 0.3425(3)   | 1.1128(7)   | 0.036(2)    |
| C4'  | 0.0562(7)   | 0.3226(3)   | 1.0787(8)   | 0.039(2)    |
| C5'  | 0.0265(7)   | 0.3075(3)   | 0.9785(7)   | 0.036(2)    |
| C6'  | 0.1063(6)   | 0.3128(3)   | 0.9046(7)   | 0.0285(18)  |
| C7'  | 0.0810(6)   | 0.2965(3)   | 0.8011(7)   | 0.0273(17)  |
| C8'  | 0.1613(6)   | 0.3009(3)   | 0.7333(7)   | 0.0275(17)  |
| C9'  | 0.2708(6)   | 0.3233(2)   | 0.7706(6)   | 0.0221(15)  |
| C10' | 0.3676(6)   | 0.3250(2)   | 0.7082(6)   | 0.0223(15)  |
| C11' | 0.3553(7)   | 0.3107(3)   | 0.6039(7)   | 0.0294(17)  |
| C12' | 0.4522(8)   | 0.3106(3)   | 0.5552(7)   | 0.0337(19)  |

|      |             |            |             |            |
|------|-------------|------------|-------------|------------|
| C13' | 0.5661(6)   | 0.3213(3)  | 0.6125(6)   | 0.0274(17) |
| C14' | 0.6735(7)   | 0.3173(3)  | 0.5696(7)   | 0.0314(18) |
| C15' | 0.7808(7)   | 0.3259(3)  | 0.6294(8)   | 0.037(2)   |
| C16' | 0.7872(6)   | 0.3382(3)  | 0.7360(7)   | 0.0290(17) |
| C17' | 0.6861(6)   | 0.3430(2)  | 0.7806(7)   | 0.0255(16) |
| C18' | 0.5743(6)   | 0.3356(2)  | 0.7178(6)   | 0.0236(16) |
| C19' | 0.2395(6)   | 0.4193(2)  | 0.7113(6)   | 0.0244(15) |
| C20' | 0.1527(6)   | 0.4150(2)  | 0.7781(6)   | 0.0239(15) |
| C21' | 0.0363(7)   | 0.4110(3)  | 0.7375(7)   | 0.0332(19) |
| C22' | -0.0035(7)  | 0.4117(3)  | 0.6287(8)   | 0.039(2)   |
| C23' | 0.0770(7)   | 0.4192(3)  | 0.5632(7)   | 0.036(2)   |
| C24' | 0.1996(7)   | 0.4239(3)  | 0.6023(7)   | 0.0307(18) |
| C25' | 0.2862(7)   | 0.4342(3)  | 0.5366(6)   | 0.0322(19) |
| C26' | 0.4034(7)   | 0.4400(3)  | 0.5811(6)   | 0.0285(17) |
| C27' | 0.4381(6)   | 0.4316(2)  | 0.6909(6)   | 0.0199(14) |
| C28' | 0.5595(6)   | 0.4370(2)  | 0.7485(5)   | 0.0183(14) |
| C29' | 0.6513(6)   | 0.4576(2)  | 0.7034(5)   | 0.0187(14) |
| C30' | 0.7593(6)   | 0.4644(2)  | 0.7650(6)   | 0.0228(15) |
| C31' | 0.7798(6)   | 0.4525(2)  | 0.8718(6)   | 0.0208(14) |
| C32' | 0.8890(6)   | 0.4606(3)  | 0.9419(6)   | 0.0319(18) |
| C33' | 0.9018(7)   | 0.4502(3)  | 1.0451(7)   | 0.042(2)   |
| C34' | 0.8065(7)   | 0.4313(3)  | 1.0878(6)   | 0.036(2)   |
| C35' | 0.7008(6)   | 0.4227(3)  | 1.0231(6)   | 0.0270(17) |
| C36' | 0.6835(6)   | 0.4326(2)  | 0.9139(6)   | 0.0217(15) |
| C37' | 0.5760(8)   | 0.3182(3)  | 1.0493(8)   | 0.042(2)   |
| C38' | 0.6325(10)  | 0.2885(4)  | 1.1330(9)   | 0.059(3)   |
| C39' | 0.6488(14)  | 0.3120(5)  | 1.2404(11)  | 0.088(5)   |
| C40' | 0.5392(14)  | 0.3303(4)  | 1.2709(9)   | 0.078(4)   |
| C41' | 0.4442(14)  | 0.2980(5)  | 1.2845(8)   | 0.069(4)   |
| C42' | 0.3712(14)  | 0.2706(5)  | 1.2956(11)  | 0.084(5)   |
| C43' | 0.3797(6)   | 0.4549(3)  | 1.0355(5)   | 0.0218(15) |
| C44' | 0.3466(7)   | 0.4903(3)  | 1.0987(6)   | 0.0300(17) |
| C45' | 0.2335(8)   | 0.4809(4)  | 1.1431(7)   | 0.044(2)   |
| C46' | 0.2550(9)   | 0.4480(4)  | 1.2318(7)   | 0.053(3)   |
| C47' | 0.1452(10)  | 0.4341(4)  | 1.2660(7)   | 0.058(3)   |
| C48' | 0.0560(9)   | 0.4199(5)  | 1.2881(8)   | 0.070(4)   |
| P1'  | 0.63953(19) | 0.45801(8) | 0.35168(17) | 0.0337(5)  |
| F1'  | 0.7659(6)   | 0.4376(3)  | 0.3486(5)   | 0.070(2)   |
| F2'  | 0.6687(6)   | 0.4946(2)  | 0.2735(5)   | 0.0606(16) |
| F3'  | 0.5134(5)   | 0.4798(2)  | 0.3574(5)   | 0.0644(18) |
| F4'  | 0.6108(6)   | 0.4215(2)  | 0.4301(5)   | 0.0611(17) |
| F5'  | 0.6940(5)   | 0.4872(2)  | 0.4506(5)   | 0.0612(17) |
| F6'  | 0.5803(7)   | 0.4305(2)  | 0.2507(5)   | 0.070(2)   |

|      |            |            |             |           |
|------|------------|------------|-------------|-----------|
| P2'  | 0.0134(2)  | 0.28833(8) | 0.39060(17) | 0.0364(5) |
| F7'  | 0.1199(7)  | 0.3090(3)  | 0.3474(6)   | 0.091(2)  |
| F8'  | -0.0022(9) | 0.2517(4)  | 0.3067(7)   | 0.112(3)  |
| F9'  | -0.0962(6) | 0.2690(3)  | 0.4355(5)   | 0.072(2)  |
| F10' | 0.0329(8)  | 0.3229(3)  | 0.4826(8)   | 0.104(3)  |
| F11' | 0.1024(8)  | 0.2593(3)  | 0.4689(7)   | 0.090(2)  |
| F12' | -0.0685(8) | 0.3183(4)  | 0.3131(8)   | 0.120(3)  |

Table S7.3. Positional Parameters for Hydrogens in Compound 3

| Atom | x         | y         | z         | U(eq) |
|------|-----------|-----------|-----------|-------|
| H2   | 0.053372  | 0.137043  | 0.408735  | 0.03  |
| H3   | -0.12298  | 0.142593  | 0.47608   | 0.04  |
| H4   | -0.123375 | 0.170874  | 0.645052  | 0.041 |
| H5   | 0.048853  | 0.198585  | 0.743064  | 0.046 |
| H7   | 0.268683  | 0.2142    | 0.758843  | 0.039 |
| H8   | 0.438219  | 0.218222  | 0.677429  | 0.034 |
| H11  | 0.587454  | 0.2175    | 0.593268  | 0.031 |
| H12  | 0.73636   | 0.220072  | 0.489455  | 0.029 |
| H14  | 0.800001  | 0.205964  | 0.311631  | 0.033 |
| H15  | 0.755271  | 0.178677  | 0.142329  | 0.035 |
| H16  | 0.563646  | 0.149823  | 0.080691  | 0.033 |
| H17  | 0.424578  | 0.143076  | 0.190665  | 0.026 |
| H20  | 0.28453   | 0.096809  | 0.617964  | 0.033 |
| H21  | 0.318912  | 0.10518   | 0.80031   | 0.041 |
| H22  | 0.511367  | 0.101697  | 0.896373  | 0.046 |
| H23  | 0.672529  | 0.089257  | 0.812603  | 0.043 |
| H25  | 0.751482  | 0.072272  | 0.640339  | 0.041 |
| H26  | 0.708342  | 0.056152  | 0.46237   | 0.034 |
| H29  | 0.649306  | 0.032997  | 0.304459  | 0.03  |
| H30  | 0.584367  | 0.019176  | 0.126717  | 0.032 |
| H32  | 0.418673  | 0.021358  | -0.031478 | 0.035 |
| H33  | 0.225297  | 0.039503  | -0.102284 | 0.037 |
| H34  | 0.097671  | 0.069828  | 0.005359  | 0.034 |
| H35  | 0.167414  | 0.084591  | 0.181123  | 0.026 |
| H38a | 0.046396  | 0.221161  | 0.135822  | 0.035 |
| H38b | -0.001195 | 0.175776  | 0.086124  | 0.035 |
| H39a | 0.174932  | 0.16906   | 0.006674  | 0.043 |
| H39b | 0.09963   | 0.210915  | -0.036114 | 0.043 |
| H40a | 0.229791  | 0.255109  | 0.076703  | 0.043 |
| H40b | 0.300004  | 0.214252  | 0.13149   | 0.043 |
| H42  | 0.475518  | 0.232507  | -0.107906 | 0.076 |
| H44a | 0.083963  | -0.009704 | 0.485811  | 0.04  |
| H44b | -0.020517 | 0.009334  | 0.398423  | 0.04  |

|       |           |          |          |       |
|-------|-----------|----------|----------|-------|
| H45a  | -0.089591 | 0.013472 | 0.55737  | 0.042 |
| H45b  | -0.061276 | 0.061797 | 0.526489 | 0.042 |
| H46a  | 0.084403  | 0.010195 | 0.682367 | 0.062 |
| H46b  | 0.130109  | 0.055155 | 0.643638 | 0.062 |
| H48   | -0.076895 | 0.095434 | 0.848201 | 0.068 |
| H2'   | 0.319526  | 0.362518 | 1.066357 | 0.039 |
| H3'   | 0.186216  | 0.351851 | 1.184075 | 0.048 |
| H4'   | 0.001082  | 0.319542 | 1.126571 | 0.052 |
| H5'   | -0.047854 | 0.293283 | 0.957413 | 0.048 |
| H7'   | 0.007062  | 0.282275 | 0.77792  | 0.036 |
| H8'   | 0.145201  | 0.289365 | 0.663649 | 0.037 |
| H11'  | 0.279962  | 0.301126 | 0.567479 | 0.039 |
| H12'  | 0.4438    | 0.303453 | 0.482247 | 0.045 |
| H14'  | 0.669753  | 0.308356 | 0.498221 | 0.042 |
| H15'  | 0.851816  | 0.32377  | 0.599483 | 0.049 |
| H16'  | 0.863235  | 0.343329 | 0.778003 | 0.039 |
| H17'  | 0.691801  | 0.351117 | 0.852793 | 0.034 |
| H20'  | 0.177237  | 0.414862 | 0.85276  | 0.032 |
| H21'  | -0.020143 | 0.407724 | 0.783927 | 0.044 |
| H22'  | -0.08552  | 0.407007 | 0.600697 | 0.052 |
| H23'  | 0.049558  | 0.42139  | 0.489157 | 0.048 |
| H25'  | 0.262207  | 0.437099 | 0.462202 | 0.043 |
| H26'  | 0.460332  | 0.449505 | 0.539549 | 0.038 |
| H29'  | 0.637121  | 0.46651  | 0.631472 | 0.025 |
| H30'  | 0.821723  | 0.477484 | 0.735114 | 0.03  |
| H32'  | 0.95381   | 0.473535 | 0.915259 | 0.042 |
| H33'  | 0.975859  | 0.45554  | 1.090058 | 0.056 |
| H34'  | 0.816177  | 0.424598 | 1.161085 | 0.048 |
| H35'  | 0.637521  | 0.409709 | 1.05206  | 0.036 |
| H38a' | 0.711157  | 0.278911 | 1.117753 | 0.079 |
| H38b' | 0.581383  | 0.262758 | 1.135182 | 0.079 |
| H39a' | 0.684184  | 0.29151  | 1.296172 | 0.118 |
| H39b' | 0.707162  | 0.335579 | 1.238834 | 0.118 |
| H40a' | 0.504711  | 0.351381 | 1.216217 | 0.103 |
| H40b' | 0.561698  | 0.346221 | 1.338271 | 0.103 |
| H42'  | 0.314089  | 0.249077 | 1.30428  | 0.112 |
| H44a' | 0.334446  | 0.516503 | 1.054423 | 0.04  |
| H44b' | 0.412928  | 0.495929 | 1.157869 | 0.04  |
| H45a' | 0.203564  | 0.507877 | 1.170236 | 0.058 |
| H45b' | 0.171296  | 0.469911 | 1.085777 | 0.058 |
| H46a' | 0.295777  | 0.422636 | 1.207487 | 0.071 |
| H46b' | 0.308871  | 0.460646 | 1.292873 | 0.071 |



H48' -0.015815 0.408491 1.305818 0.093

Table S7.4. Bond Distances in Compound 3

|           |           |           |           |           |           |
|-----------|-----------|-----------|-----------|-----------|-----------|
| Ru1-N1    | 2.072(6)  | Ru1-N2    | 2.084(6)  | Ru1-N3    | 2.084(6)  |
| Ru1-N4    | 2.093(6)  | Ru1-N5    | 2.025(6)  | Ru1-N6    | 2.024(6)  |
| N1-C1     | 1.378(9)  | N1-C9     | 1.341(9)  | N2-C10    | 1.346(9)  |
| N2-C18    | 1.375(8)  | N3-C19    | 1.397(9)  | N3-C27    | 1.340(9)  |
| N4-C28    | 1.341(8)  | N4-C36    | 1.380(8)  | N5-C37    | 1.153(9)  |
| N6-C43    | 1.140(9)  | C1-C2     | 1.418(10) | C1-C6     | 1.415(10) |
| C2-C3     | 1.368(10) | C3-C4     | 1.399(11) | C4-C5     | 1.362(13) |
| C5-C6     | 1.432(10) | C6-C7     | 1.398(12) | C7-C8     | 1.375(11) |
| C8-C9     | 1.425(10) | C9-C10    | 1.474(9)  | C10-C11   | 1.402(10) |
| C11-C12   | 1.368(10) | C12-C13   | 1.422(10) | C13-C14   | 1.404(10) |
| C13-C18   | 1.435(9)  | C14-C15   | 1.358(11) | C15-C16   | 1.420(10) |
| C16-C17   | 1.354(9)  | C17-C18   | 1.425(10) | C19-C20   | 1.390(10) |
| C19-C24   | 1.416(10) | C20-C21   | 1.374(10) | C21-C22   | 1.384(12) |
| C22-C23   | 1.356(12) | C23-C24   | 1.423(10) | C24-C25   | 1.434(11) |
| C25-C26   | 1.347(11) | C26-C27   | 1.422(10) | C27-C28   | 1.480(10) |
| C28-C29   | 1.423(10) | C29-C30   | 1.358(10) | C30-C31   | 1.404(10) |
| C31-C32   | 1.427(10) | C31-C36   | 1.424(9)  | C32-C33   | 1.355(11) |
| C33-C34   | 1.412(10) | C34-C35   | 1.365(10) | C35-C36   | 1.412(9)  |
| C37-C38   | 1.472(10) | C38-C39   | 1.533(10) | C39-C40   | 1.516(12) |
| C40-C41   | 1.469(12) | C41-C42   | 1.161(13) | C43-C44   | 1.477(10) |
| C44-C45   | 1.525(11) | C45-C46   | 1.529(12) | C46-C47   | 1.452(14) |
| C47-C48   | 1.175(14) | P1-F1     | 1.599(6)  | P1-F2     | 1.593(6)  |
| P1-F3     | 1.604(6)  | P1-F4     | 1.600(5)  | P1-F5     | 1.593(5)  |
| P1-F6     | 1.608(5)  | P2-F7     | 1.579(6)  | P2-F8     | 1.584(5)  |
| P2-F9     | 1.581(7)  | P2-F10    | 1.587(5)  | P2-F11    | 1.607(7)  |
| P2-F12    | 1.584(8)  | Ru1'-N1'  | 2.094(6)  | Ru1'-N2'  | 2.060(6)  |
| Ru1'-N3'  | 2.076(6)  | Ru1'-N4'  | 2.080(6)  | Ru1'-N5'  | 2.027(7)  |
| Ru1'-N6'  | 2.040(6)  | N1'-C1'   | 1.383(9)  | N1'-C9'   | 1.343(10) |
| N2'-C10'  | 1.332(9)  | N2'-C18'  | 1.393(9)  | N3'-C19'  | 1.362(9)  |
| N3'-C27'  | 1.346(8)  | N4'-C28'  | 1.348(9)  | N4'-C36'  | 1.369(9)  |
| N5'-C37'  | 1.137(11) | N6'-C43'  | 1.139(10) | C1'-C2'   | 1.402(11) |
| C1'-C6'   | 1.414(10) | C2'-C3'   | 1.382(10) | C3'-C4'   | 1.391(13) |
| C4'-C5'   | 1.356(14) | C5'-C6'   | 1.424(11) | C6'-C7'   | 1.404(12) |
| C7'-C8'   | 1.367(10) | C8'-C9'   | 1.434(10) | C9'-C10'  | 1.463(10) |
| C10'-C11' | 1.393(11) | C11'-C12' | 1.350(11) | C12'-C13' | 1.413(11) |
| C13'-C14' | 1.422(10) | C13'-C18' | 1.410(11) | C14'-C15' | 1.352(12) |
| C15'-C16' | 1.409(12) | C16'-C17' | 1.371(10) | C17'-C18' | 1.402(11) |
| C19'-C20' | 1.414(10) | C19'-C24' | 1.402(11) | C20'-C21' | 1.341(11) |
| C21'-C22' | 1.391(13) | C22'-C23' | 1.359(12) | C23'-C24' | 1.404(11) |
| C24'-C25' | 1.432(11) | C25'-C26' | 1.367(11) | C26'-C27' | 1.420(10) |

|           |           |           |           |           |           |
|-----------|-----------|-----------|-----------|-----------|-----------|
| C27'-C28' | 1.458(10) | C28'-C29' | 1.423(9)  | C29'-C30' | 1.357(10) |
| C30'-C31' | 1.399(10) | C31'-C32' | 1.424(10) | C31'-C36' | 1.436(9)  |
| C32'-C33' | 1.346(12) | C33'-C34' | 1.417(11) | C34'-C35' | 1.364(11) |
| C35'-C36' | 1.415(10) | C37'-C38' | 1.476(13) | C38'-C39' | 1.542(19) |
| C39'-C40' | 1.48(2)   | C40'-C41' | 1.50(2)   | C41'-C42' | 1.21(2)   |
| C43'-C44' | 1.450(11) | C44'-C45' | 1.515(11) | C45'-C46' | 1.516(14) |
| C46'-C47' | 1.453(13) | C47'-C48' | 1.180(14) | P1'-F1'   | 1.574(6)  |
| P1'-F2'   | 1.587(6)  | P1'-F3'   | 1.595(6)  | P1'-F4'   | 1.585(6)  |
| P1'-F5'   | 1.597(6)  | P1'-F6'   | 1.601(7)  | P2'-F7'   | 1.549(7)  |
| P2'-F8'   | 1.555(9)  | P2'-F9'   | 1.574(6)  | P2'-F10'  | 1.583(9)  |
| P2'-F11'  | 1.582(8)  | P2'-F12'  | 1.552(9)  |           |           |

Table S7.5. Bond Angles in Compound 3

|             |          |             |          |             |          |
|-------------|----------|-------------|----------|-------------|----------|
| N1-Ru1-N2   | 77.8(2)  | N1-Ru1-N3   | 94.7(2)  | N1-Ru1-N4   | 170.8(2) |
| N2-Ru1-N4   | 95.7(2)  | N3-Ru1-N2   | 82.6(2)  | N3-Ru1-N4   | 77.9(2)  |
| N5-Ru1-N1   | 88.0(2)  | N5-Ru1-N2   | 92.1(2)  | N5-Ru1-N3   | 173.3(2) |
| N5-Ru1-N4   | 98.8(2)  | N6-Ru1-N1   | 96.5(2)  | N6-Ru1-N2   | 170.7(2) |
| N6-Ru1-N3   | 90.7(2)  | N6-Ru1-N4   | 89.1(2)  | N6-Ru1-N5   | 95.0(2)  |
| C1-N1-Ru1   | 128.4(5) | C9-N1-Ru1   | 111.2(4) | C9-N1-C1    | 119.3(6) |
| C10-N2-Ru1  | 110.7(4) | C10-N2-C18  | 118.8(6) | C18-N2-Ru1  | 128.8(5) |
| C19-N3-Ru1  | 128.1(5) | C27-N3-Ru1  | 110.8(4) | C27-N3-C19  | 118.6(6) |
| C28-N4-Ru1  | 111.4(4) | C28-N4-C36  | 118.3(6) | C36-N4-Ru1  | 129.4(4) |
| C37-N5-Ru1  | 177.9(6) | C43-N6-Ru1  | 171.5(6) | N1-C1-C2    | 120.4(6) |
| N1-C1-C6    | 120.2(7) | C6-C1-C2    | 119.3(6) | C3-C2-C1    | 120.1(7) |
| C2-C3-C4    | 120.7(8) | C5-C4-C3    | 121.0(7) | C4-C5-C6    | 120.0(7) |
| C1-C6-C5    | 118.7(7) | C7-C6-C1    | 119.2(7) | C7-C6-C5    | 122.1(7) |
| C8-C7-C6    | 119.9(7) | C7-C8-C9    | 118.4(7) | N1-C9-C8    | 122.0(6) |
| N1-C9-C10   | 115.3(6) | C8-C9-C10   | 122.7(7) | N2-C10-C9   | 114.7(6) |
| N2-C10-C11  | 122.5(6) | C11-C10-C9  | 122.7(6) | C12-C11-C10 | 119.2(6) |
| C11-C12-C13 | 120.8(6) | C12-C13-C18 | 116.7(6) | C14-C13-C12 | 123.7(7) |
| C14-C13-C18 | 119.7(6) | C15-C14-C13 | 120.7(7) | C14-C15-C16 | 119.8(7) |
| C17-C16-C15 | 121.6(7) | C16-C17-C18 | 119.9(7) | N2-C18-C13  | 121.4(6) |
| N2-C18-C17  | 120.4(6) | C17-C18-C13 | 118.2(6) | N3-C19-C24  | 120.2(6) |
| C20-C19-N3  | 120.1(6) | C20-C19-C24 | 119.8(7) | C21-C20-C19 | 119.7(7) |
| C20-C21-C22 | 121.1(8) | C23-C22-C21 | 120.7(7) | C22-C23-C24 | 120.1(8) |
| C19-C24-C23 | 118.3(7) | C19-C24-C25 | 118.2(7) | C23-C24-C25 | 123.4(7) |
| C26-C25-C24 | 120.2(7) | C25-C26-C27 | 118.9(7) | N3-C27-C26  | 122.7(7) |
| N3-C27-C28  | 115.0(6) | C26-C27-C28 | 122.3(6) | N4-C28-C27  | 115.4(6) |
| N4-C28-C29  | 122.7(6) | C29-C28-C27 | 121.7(6) | C30-C29-C28 | 118.9(6) |
| C29-C30-C31 | 120.4(6) | C30-C31-C32 | 122.8(6) | C30-C31-C36 | 118.2(6) |
| C36-C31-C32 | 119.0(6) | C33-C32-C31 | 120.6(6) | C32-C33-C34 | 120.4(7) |
| C35-C34-C33 | 120.5(7) | C34-C35-C36 | 121.0(6) | N4-C36-C31  | 121.2(6) |

|                |          |                |          |                |           |
|----------------|----------|----------------|----------|----------------|-----------|
| N4-C36-C35     | 120.3(6) | C35-C36-C31    | 118.5(6) | N5-C37-C38     | 173.6(7)  |
| C37-C38-C39    | 110.3(6) | C40-C39-C38    | 111.8(7) | C41-C40-C39    | 114.9(7)  |
| C42-C41-C40    | 175.2(9) | N6-C43-C44     | 178.8(8) | C43-C44-C45    | 112.1(7)  |
| C44-C45-C46    | 113.5(7) | C47-C46-C45    | 114.6(7) | C48-C47-C46    | 178.0(11) |
| F1-P1-F3       | 179.1(4) | F1-P1-F4       | 89.3(3)  | F1-P1-F6       | 89.9(3)   |
| F2-P1-F1       | 90.4(3)  | F2-P1-F3       | 90.3(3)  | F2-P1-F4       | 179.2(3)  |
| F2-P1-F6       | 90.2(3)  | F3-P1-F6       | 89.4(3)  | F4-P1-F3       | 90.0(3)   |
| F4-P1-F6       | 89.0(3)  | F5-P1-F1       | 89.9(3)  | F5-P1-F2       | 90.7(3)   |
| F5-P1-F3       | 90.8(3)  | F5-P1-F4       | 90.1(3)  | F5-P1-F6       | 179.1(3)  |
| F7-P2-F8       | 89.5(3)  | F7-P2-F9       | 178.4(5) | F7-P2-F10      | 90.6(3)   |
| F7-P2-F11      | 89.0(4)  | F7-P2-F12      | 87.1(4)  | F8-P2-F10      | 179.2(4)  |
| F8-P2-F11      | 90.7(3)  | F8-P2-F12      | 89.1(4)  | F9-P2-F8       | 90.6(4)   |
| F9-P2-F10      | 89.2(4)  | F9-P2-F11      | 92.7(5)  | F9-P2-F12      | 91.2(5)   |
| F10-P2-F11     | 90.1(3)  | F12-P2-F10     | 90.2(4)  | F12-P2-F11     | 176.1(5)  |
| N2'-Ru1'-N1'   | 77.4(2)  | N2'-Ru1'-N3'   | 83.3(2)  | N2'-Ru1'-N4'   | 92.2(2)   |
| N3'-Ru1'-N1'   | 92.3(2)  | N3'-Ru1'-N4'   | 77.2(2)  | N4'-Ru1'-N1'   | 166.1(2)  |
| N5'-Ru1'-N1'   | 88.3(3)  | N5'-Ru1'-N2'   | 90.7(3)  | N5'-Ru1'-N3'   | 173.7(3)  |
| N5'-Ru1'-N4'   | 101.2(2) | N5'-Ru1'-N6'   | 94.7(3)  | N6'-Ru1'-N1'   | 101.7(2)  |
| N6'-Ru1'-N2'   | 174.5(3) | N6'-Ru1'-N3'   | 91.3(2)  | N6'-Ru1'-N4'   | 87.8(2)   |
| C1'-N1'-Ru1'   | 129.5(6) | C9'-N1'-Ru1'   | 110.1(4) | C9'-N1'-C1'    | 119.8(6)  |
| C10'-N2'-Ru1'  | 111.5(5) | C10'-N2'-C18'  | 119.1(6) | C18'-N2'-Ru1'  | 127.4(5)  |
| C19'-N3'-Ru1'  | 126.0(5) | C27'-N3'-Ru1'  | 110.6(4) | C27'-N3'-C19'  | 119.7(6)  |
| C28'-N4'-Ru1'  | 111.6(4) | C28'-N4'-C36'  | 119.2(6) | C36'-N4'-Ru1'  | 128.9(5)  |
| C37'-N5'-Ru1'  | 174.6(8) | C43'-N6'-Ru1'  | 173.0(6) | N1'-C1'-C2'    | 120.4(7)  |
| N1'-C1'-C6'    | 119.9(7) | C2'-C1'-C6'    | 119.7(7) | C3'-C2'-C1'    | 120.1(8)  |
| C2'-C3'-C4'    | 120.2(8) | C5'-C4'-C3'    | 121.2(8) | C4'-C5'-C6'    | 120.3(8)  |
| C1'-C6'-C5'    | 118.5(8) | C7'-C6'-C1'    | 119.2(7) | C7'-C6'-C5'    | 122.2(7)  |
| C8'-C7'-C6'    | 120.8(7) | C7'-C8'-C9'    | 117.9(8) | N1'-C9'-C8'    | 122.2(6)  |
| N1'-C9'-C10'   | 116.2(6) | C8'-C9'-C10'   | 121.4(7) | N2'-C10'-C9'   | 113.9(7)  |
| N2'-C10'-C11'  | 122.7(6) | C11'-C10'-C9'  | 123.4(7) | C12'-C11'-C10' | 119.0(8)  |
| C11'-C12'-C13' | 120.2(8) | C12'-C13'-C14' | 123.1(7) | C18'-C13'-C12' | 118.6(6)  |
| C18'-C13'-C14' | 118.3(7) | C15'-C14'-C13' | 120.8(8) | C14'-C15'-C16' | 119.9(7)  |
| C17'-C16'-C15' | 121.5(7) | C16'-C17'-C18' | 118.8(8) | N2'-C18'-C13'  | 119.3(7)  |
| N2'-C18'-C17'  | 120.0(7) | C17'-C18'-C13' | 120.6(7) | N3'-C19'-C20'  | 120.9(7)  |
| N3'-C19'-C24'  | 121.0(7) | C24'-C19'-C20' | 118.1(7) | C21'-C20'-C19' | 120.8(8)  |
| C20'-C21'-C22' | 121.4(7) | C23'-C22'-C21' | 118.8(8) | C22'-C23'-C24' | 121.6(8)  |
| C19'-C24'-C23' | 118.7(7) | C19'-C24'-C25' | 118.0(7) | C23'-C24'-C25' | 123.3(8)  |
| C26'-C25'-C24' | 119.8(7) | C25'-C26'-C27' | 118.6(7) | N3'-C27'-C26'  | 121.8(6)  |
| N3'-C27'-C28'  | 114.0(6) | C26'-C27'-C28' | 124.1(6) | N4'-C28'-C27'  | 115.4(6)  |
| N4'-C28'-C29'  | 121.9(6) | C29'-C28'-C27' | 122.6(6) | C30'-C29'-C28' | 118.9(6)  |
| C29'-C30'-C31' | 120.9(6) | C30'-C31'-C32' | 123.7(6) | C30'-C31'-C36' | 117.9(6)  |
| C32'-C31'-C36' | 118.3(6) | C33'-C32'-C31' | 121.1(7) | C32'-C33'-C34' | 121.0(8)  |
| C35'-C34'-C33' | 119.7(7) | C34'-C35'-C36' | 121.3(7) | N4'-C36'-C31'  | 120.7(6)  |

|                |           |                |           |                |           |
|----------------|-----------|----------------|-----------|----------------|-----------|
| N4'-C36'-C35'  | 120.8(6)  | C35'-C36'-C31' | 118.5(6)  | N5'-C37'-C38'  | 175.1(11) |
| C37'-C38'-C39' | 109.0(10) | C40'-C39'-C38' | 116.0(10) | C39'-C40'-C41' | 115.0(12) |
| C42'-C41'-C40' | 177.2(15) | N6'-C43'-C44'  | 177.5(7)  | C43'-C44'-C45' | 112.2(8)  |
| C46'-C45'-C44' | 111.8(8)  | C47'-C46'-C45' | 112.9(9)  | C48'-C47'-C46' | 174.4(14) |
| F1'-P1'-F2'    | 89.2(4)   | F1'-P1'-F3'    | 178.2(4)  | F1'-P1'-F4'    | 90.7(4)   |
| F1'-P1'-F5'    | 90.9(4)   | F1'-P1'-F6'    | 91.4(4)   | F2'-P1'-F3'    | 90.4(4)   |
| F2'-P1'-F5'    | 90.0(4)   | F2'-P1'-F6'    | 88.6(3)   | F3'-P1'-F5'    | 87.3(4)   |
| F3'-P1'-F6'    | 90.3(4)   | F4'-P1'-F2'    | 179.8(5)  | F4'-P1'-F3'    | 89.7(4)   |
| F4'-P1'-F5'    | 89.8(4)   | F4'-P1'-F6'    | 91.6(4)   | F5'-P1'-F6'    | 177.2(4)  |
| F7'-P2'-F8'    | 93.5(5)   | F7'-P2'-F9'    | 178.0(5)  | F7'-P2'-F10'   | 88.0(5)   |
| F7'-P2'-F11'   | 90.6(5)   | F7'-P2'-F12'   | 86.6(5)   | F8'-P2'-F9'    | 88.1(5)   |
| F8'-P2'-F10'   | 175.6(6)  | F8'-P2'-F11'   | 90.4(6)   | F9'-P2'-F10'   | 90.5(4)   |
| F9'-P2'-F11'   | 90.5(4)   | F11'-P2'-F10'  | 85.4(5)   | F12'-P2'-F8'   | 90.6(6)   |
| F12'-P2'-F9'   | 92.2(5)   | F12'-P2'-F10'  | 93.6(6)   | F12'-P2'-F11'  | 177.1(5)  |

This report has been created with Olex2 [6], compiled on 2018.04.18 svn.r3501 for OlexSys.

## References

- [1] APEX2 2014.11-0: Bruker-AXS, Madison, Wisconsin, USA (2014).
- [2] SAINT v8.34A: Bruker-AXS, Madison, Wisconsin, USA (2014).
- [3] SADABS v2014/5: Krause, L., Herbst-Irmer, R., Sheldrick, G.M. & Stalke, D., *J. Appl. Cryst.*, 48, 3-10 (2015).
- [4] SHELXS-97: Sheldrick, G.M., *Acta Cryst.*, A64, 112-122 (2008).
- [5] SHELXL-2017/1: Sheldrick, G.M., *Acta Cryst.*, A71, 3-8 (2015).
- [6] Olex2: Dolomanov, O.V., Bourhis, L.J., Gildea, R.J., Howard, J.A.K., Puschmann, H., *J. Appl. Cryst.*, 42, 339-341 (2009)

**Figure S8 – Crystal Structure Determination of Ru(biq)(bpy)(5-hexynenitrile)<sub>2</sub>[PF<sub>6</sub>]<sub>2</sub>**

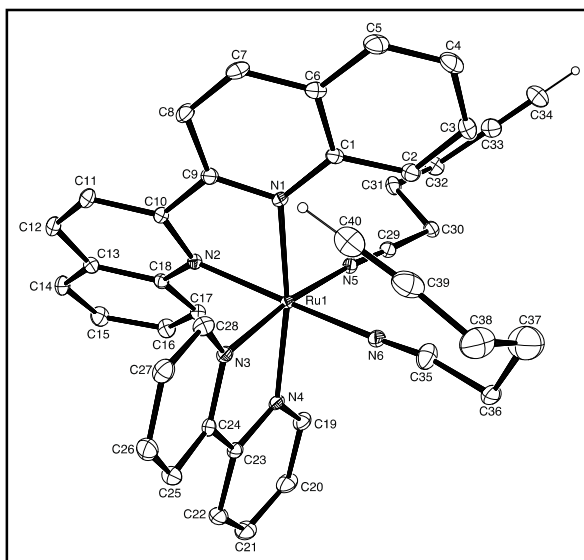

**Figure S8.1.** ORTEP drawing of the title compound with 50% thermal ellipsoids. This particular compound was synthesized in harsh conditions that promoted cis-alkane conformation for nitrile ligand. Ru(biq)(bpy)(5-hexynenitrile)<sub>2</sub>[PF<sub>6</sub>]<sub>2</sub>, C<sub>44</sub>H<sub>44</sub>F<sub>12</sub>N<sub>6</sub>OP<sub>2</sub>Ru, crystallizes in the triclinic space group

$P\bar{1}$  with  $a=11.4840(5)\text{\AA}$ ,  $b=14.0467(6)\text{\AA}$ ,  $c=16.5321(7)\text{\AA}$ ,  $\alpha=67.166(2)^\circ$ ,  $\beta=83.813(2)^\circ$ ,  $\gamma=67.008(2)^\circ$ ,  $V=2259.57(17)\text{\AA}^3$ ,  $Z=2$ , and  $d_{\text{calc}}=1.564\text{ g/cm}^3$ . X-ray intensity data were collected on a Bruker D8QUEST [1] CMOS area detector employing graphite-monochromated Mo-K $\alpha$  radiation ( $\lambda=0.71073\text{\AA}$ ) at a temperature of 100K. Preliminary indexing was performed from a series of twenty-four  $0.5^\circ$  rotation frames with exposures of 10 seconds. A total of 1520 frames were collected with a crystal to detector distance of 33.0 mm, rotation widths of  $0.5^\circ$  and exposures of 15 seconds:

| scan type | $2\theta$ | $\omega$ | $\varphi$ | $\chi$ | Frames |
|-----------|-----------|----------|-----------|--------|--------|
| $\omega$  | 7.71      | 201.40   | 288.00    | 54.72  | 304    |
| $\omega$  | 7.71      | 201.40   | 0.00      | 54.72  | 304    |
| $\omega$  | 7.71      | 201.40   | 144.00    | 54.72  | 304    |
| $\omega$  | 7.71      | 201.40   | 72.00     | 54.72  | 304    |
| $\omega$  | 7.71      | 201.40   | 216.00    | 54.72  | 304    |

Rotation frames were integrated using SAINT [2], producing a listing of unaveraged  $F^2$  and  $\sigma(F^2)$  values. A total of 66656 reflections were measured over the ranges  $5.974 \leq 2\theta \leq 55.112^\circ$ ,  $-14 \leq h \leq 14$ ,  $-18 \leq k \leq 18$ ,  $-21 \leq l \leq 21$  yielding 10417 unique reflections ( $R_{\text{int}} = 0.0453$ ). The intensity data were corrected for Lorentz and polarization effects and for absorption using SADABS [3] (minimum and maximum transmission 0.7183, 0.7456). The structure was solved by direct methods - ShelXT [4]. Refinement was by full-matrix least squares based on  $F^2$  using SHELXL-2017 [5]. All reflections were used during refinement. The weighting scheme used was  $w=1/[\sigma^2(F_o^2) + (0.0281P)^2 + 4.8088P]$  where  $P = (F_o^2 + 2F_c^2)/3$ . Non-hydrogen atoms were refined anisotropically and hydrogen atoms were refined using a riding model. Refinement converged to  $R1=0.0426$  and  $wR2=0.0901$  for 9062 observed reflections for which  $F >$

$4\sigma(F)$  and  $R_1=0.0521$  and  $wR_2=0.0952$  and  $GOF = 1.093$  for all 10417 unique, non-zero reflections and 642 variables. The maximum  $\sigma/\sigma$  in the final cycle of least squares was 0.002 and the two most prominent peaks in the final difference Fourier were  $+0.98$  and  $-0.92 \text{ e}/\text{\AA}^3$ .

Table S8.1. lists cell information, data collection parameters, and refinement data. Final positional parameters are given in Table S8.2. Anisotropic thermal parameters are in Table S8.3. Tables S8.4. and S8.5. list bond distances and bond angles. Figure S8.1. is an ORTEP representation of the molecule with 50% probability thermal ellipsoids displayed.

Table S8.1. Summary of Structure Determination of  $\text{Ru}(\text{biq})(\text{bpy})(5\text{-hexynenitrile})_2[\text{PF}_6]_2$

|                                         |                                                                         |
|-----------------------------------------|-------------------------------------------------------------------------|
| Empirical formula                       | $\text{C}_{44}\text{H}_{44}\text{F}_{12}\text{N}_6\text{OP}_2\text{Ru}$ |
| Formula weight                          | 1063.86                                                                 |
| Temperature/K                           | 100                                                                     |
| Crystal system                          | triclinic                                                               |
| Space group                             | $P\bar{1}$                                                              |
| a                                       | 11.4840(5) $\text{\AA}$                                                 |
| b                                       | 14.0467(6) $\text{\AA}$                                                 |
| c                                       | 16.5321(7) $\text{\AA}$                                                 |
| $\alpha$                                | 67.166(2)°                                                              |
| $\beta$                                 | 83.813(2)°                                                              |
| $\gamma$                                | 67.008(2)°                                                              |
| Volume                                  | 2259.57(17) $\text{\AA}^3$                                              |
| Z                                       | 2                                                                       |
| $d_{\text{calc}}$                       | 1.564 $\text{g}/\text{cm}^3$                                            |
| $\rho$                                  | 0.510 $\text{mm}^{-1}$                                                  |
| F(000)                                  | 1080.0                                                                  |
| Crystal size, mm                        | 0.15 $\times$ 0.12 $\times$ 0.1                                         |
| $2\theta$ range for data collection     | 5.974 - 55.112°                                                         |
| Index ranges                            | $-14 \leq h \leq 14$ , $-18 \leq k \leq 18$ , $-21 \leq l \leq 21$      |
| Reflections collected                   | 66656                                                                   |
| Independent reflections                 | 10417 [ $R(\text{int}) = 0.0453$ ]                                      |
| Data/restraints/parameters              | 10417/168/642                                                           |
| Goodness-of-fit on $F^2$                | 1.093                                                                   |
| Final R indexes [ $I \geq 2\sigma(I)$ ] | $R_1 = 0.0426$ , $wR_2 = 0.0901$                                        |
| Final R indexes [all data]              | $R_1 = 0.0521$ , $wR_2 = 0.0952$                                        |
| Largest diff. peak/hole                 | 0.98/-0.92 $\text{e}/\text{\AA}^3$                                      |

Table S8.2 . Refined Positional Parameters for  $\text{Ru}(\text{biq})(\text{bpy})(5\text{-hexynenitrile})_2[\text{PF}_6]_2$

| Atom | x           | y           | z           | U(eq)      |
|------|-------------|-------------|-------------|------------|
| Ru1  | 0.66844(2)  | 0.70629(2)  | 0.81263(2)  | 0.01337(6) |
| N1   | 0.70557(19) | 0.81355(17) | 0.69402(13) | 0.0144(4)  |
| N2   | 0.72064(19) | 0.80772(17) | 0.85228(14) | 0.0149(4)  |
| N3   | 0.8544(2)   | 0.59368(17) | 0.83610(14) | 0.0162(4)  |
| N4   | 0.6620(2)   | 0.59413(17) | 0.93805(14) | 0.0158(4)  |

|      |            |             |             |            |
|------|------------|-------------|-------------|------------|
| N5   | 0.4802(2)  | 0.80034(18) | 0.79776(14) | 0.0171(4)  |
| N6   | 0.6393(2)  | 0.60502(18) | 0.76345(14) | 0.0188(4)  |
| C1   | 0.6687(2)  | 0.8377(2)   | 0.60936(16) | 0.0161(5)  |
| C2   | 0.5681(3)  | 0.8123(2)   | 0.59329(17) | 0.0198(5)  |
| C3   | 0.5312(3)  | 0.8372(2)   | 0.50909(18) | 0.0231(6)  |
| C4   | 0.5948(3)  | 0.8868(2)   | 0.43684(18) | 0.0276(6)  |
| C5   | 0.6904(3)  | 0.9134(2)   | 0.45088(18) | 0.0268(6)  |
| C6   | 0.7292(3)  | 0.8916(2)   | 0.53677(17) | 0.0189(5)  |
| C7   | 0.8230(3)  | 0.9239(2)   | 0.55301(18) | 0.0231(6)  |
| C8   | 0.8507(3)  | 0.9074(2)   | 0.63674(18) | 0.0210(5)  |
| C9   | 0.7889(2)  | 0.8532(2)   | 0.70621(17) | 0.0167(5)  |
| C10  | 0.8022(2)  | 0.8448(2)   | 0.79671(17) | 0.0165(5)  |
| C11  | 0.8843(3)  | 0.8833(2)   | 0.82135(18) | 0.0223(6)  |
| C12  | 0.8747(3)  | 0.8911(2)   | 0.90167(18) | 0.0232(6)  |
| C13  | 0.7779(2)  | 0.8682(2)   | 0.95635(17) | 0.0186(5)  |
| C14  | 0.7539(3)  | 0.8877(2)   | 1.03551(18) | 0.0233(6)  |
| C15  | 0.6540(3)  | 0.8711(2)   | 1.08385(19) | 0.0247(6)  |
| C16  | 0.5730(3)  | 0.8365(2)   | 1.05398(18) | 0.0227(6)  |
| C17  | 0.5952(2)  | 0.8145(2)   | 0.97861(17) | 0.0176(5)  |
| C18  | 0.6999(2)  | 0.8276(2)   | 0.92880(16) | 0.0155(5)  |
| C19  | 0.5596(3)  | 0.6004(2)   | 0.98689(18) | 0.0223(6)  |
| C20  | 0.5667(3)  | 0.5281(3)   | 1.07347(19) | 0.0284(6)  |
| C21  | 0.6808(3)  | 0.4460(3)   | 1.11125(18) | 0.0291(7)  |
| C22  | 0.7865(3)  | 0.4367(2)   | 1.06139(18) | 0.0251(6)  |
| C23  | 0.7744(3)  | 0.5115(2)   | 0.97476(17) | 0.0180(5)  |
| C24  | 0.8805(2)  | 0.5065(2)   | 0.91559(17) | 0.0179(5)  |
| C25  | 0.9970(3)  | 0.4188(2)   | 0.93635(19) | 0.0242(6)  |
| C26  | 1.0904(3)  | 0.4192(2)   | 0.8762(2)   | 0.0271(6)  |
| C27  | 1.0646(3)  | 0.5072(2)   | 0.7957(2)   | 0.0251(6)  |
| C28  | 0.9455(3)  | 0.5923(2)   | 0.77774(18) | 0.0208(5)  |
| C29  | 0.3732(3)  | 0.8456(2)   | 0.78867(17) | 0.0183(5)  |
| C30  | 0.2359(2)  | 0.9073(2)   | 0.77935(17) | 0.0187(5)  |
| C31  | 0.2038(3)  | 1.0186(2)   | 0.78892(18) | 0.0213(5)  |
| C32  | 0.0608(3)  | 1.0861(2)   | 0.78019(18) | 0.0240(6)  |
| C33  | 0.0032(3)  | 1.1152(2)   | 0.6942(2)   | 0.0258(6)  |
| C34  | -0.0421(3) | 1.1387(3)   | 0.6248(2)   | 0.0345(7)  |
| C35  | 0.6313(3)  | 0.5502(3)   | 0.7305(2)   | 0.0301(7)  |
| C36  | 0.6253(9)  | 0.4629(6)   | 0.7032(4)   | 0.0337(18) |
| C36* | 0.6103(7)  | 0.5054(7)   | 0.6677(6)   | 0.0353(17) |
| C37  | 0.6547(8)  | 0.4856(8)   | 0.6045(5)   | 0.065(2)   |
| C37* | 0.7327(5)  | 0.4025(5)   | 0.6706(4)   | 0.0293(12) |
| C38  | 0.7960(7)  | 0.4518(6)   | 0.5850(5)   | 0.0478(17) |
| C38* | 0.8536(7)  | 0.4171(6)   | 0.6744(5)   | 0.0472(17) |

|      |             |             |             |             |
|------|-------------|-------------|-------------|-------------|
| C39  | 0.8444(14)  | 0.5383(10)  | 0.5753(7)   | 0.041(2)    |
| C39* | 0.8616(12)  | 0.5197(8)   | 0.6061(6)   | 0.036(2)    |
| C40  | 0.891(3)    | 0.6014(18)  | 0.5704(14)  | 0.044(4)    |
| C40* | 0.870(3)    | 0.6035(15)  | 0.5571(12)  | 0.042(3)    |
| P1   | 0.80039(7)  | 0.21270(6)  | 0.94623(5)  | 0.02430(16) |
| F1   | 0.8809(2)   | 0.08310(17) | 0.99572(18) | 0.0551(6)   |
| F2   | 0.8376(2)   | 0.2340(2)   | 1.02649(14) | 0.0527(6)   |
| F3   | 0.7230(2)   | 0.34292(18) | 0.90128(19) | 0.0680(8)   |
| F4   | 0.68097(19) | 0.19316(18) | 0.99772(17) | 0.0547(6)   |
| F5   | 0.9245(2)   | 0.2294(2)   | 0.90140(17) | 0.0604(7)   |
| F6   | 0.7692(3)   | 0.1878(3)   | 0.86872(17) | 0.0859(10)  |
| P2   | 0.21753(8)  | 0.72314(7)  | 0.62604(5)  | 0.02993(18) |
| F7   | 0.1116(2)   | 0.6955(2)   | 0.59540(14) | 0.0535(6)   |
| F8   | 0.2936(2)   | 0.7162(2)   | 0.54062(14) | 0.0572(6)   |
| F9   | 0.1396(2)   | 0.85303(19) | 0.57360(18) | 0.0681(8)   |
| F10  | 0.14030(17) | 0.73130(15) | 0.71187(13) | 0.0355(4)   |
| F11  | 0.32290(19) | 0.7490(2)   | 0.65955(16) | 0.0515(6)   |
| F12  | 0.29282(19) | 0.59254(17) | 0.67909(13) | 0.0424(5)   |
| O1   | 0.5935(2)   | 0.76812(19) | 0.29844(15) | 0.0342(5)   |
| C41  | 0.3730(4)   | 0.8735(3)   | 0.2692(3)   | 0.0516(10)  |
| C42  | 0.4725(4)   | 0.7596(3)   | 0.3051(3)   | 0.0484(9)   |
| C43  | 0.6930(4)   | 0.6633(3)   | 0.3382(3)   | 0.0530(10)  |
| C44  | 0.8171(4)   | 0.6776(3)   | 0.3255(3)   | 0.0497(10)  |

Table S8.3 . Positional Parameters for Hydrogens in Ru(biq)(bpy)(5-hexynenitrile)<sub>2</sub>[PF<sub>6</sub>]<sub>2</sub>

| Atom | x        | y        | z        | U(eq) |
|------|----------|----------|----------|-------|
| H2   | 0.525811 | 0.777611 | 0.641211 | 0.024 |
| H3   | 0.462245 | 0.821174 | 0.498965 | 0.028 |
| H4   | 0.5705   | 0.90147  | 0.378729 | 0.033 |
| H5   | 0.732169 | 0.947165 | 0.402119 | 0.032 |
| H7   | 0.867044 | 0.957112 | 0.50567  | 0.028 |
| H8   | 0.910977 | 0.932354 | 0.647896 | 0.025 |
| H11  | 0.945352 | 0.903535 | 0.782439 | 0.027 |
| H12  | 0.933013 | 0.911861 | 0.920787 | 0.028 |
| H14  | 0.8075   | 0.912311 | 1.055253 | 0.028 |
| H15  | 0.639252 | 0.883029 | 1.137457 | 0.03  |
| H16  | 0.501859 | 0.828241 | 1.086579 | 0.027 |
| H17  | 0.540101 | 0.790403 | 0.959839 | 0.021 |
| H19  | 0.479688 | 0.65631  | 0.961079 | 0.027 |
| H20  | 0.492821 | 0.535421 | 1.106416 | 0.034 |



|      |          |          |          |       |
|------|----------|----------|----------|-------|
| H21  | 0.687317 | 0.39629  | 1.170729 | 0.035 |
| H22  | 0.866431 | 0.379823 | 1.086038 | 0.03  |
| H25  | 1.012888 | 0.358538 | 0.99175  | 0.029 |
| H26  | 1.171215 | 0.359788 | 0.889959 | 0.033 |
| H27  | 1.127344 | 0.509274 | 0.753385 | 0.03  |
| H28  | 0.92768  | 0.652096 | 0.721978 | 0.025 |
| H30a | 0.194329 | 0.862546 | 0.82491  | 0.022 |
| H30b | 0.20376  | 0.921079 | 0.721009 | 0.022 |
| H31a | 0.245774 | 1.062872 | 0.743238 | 0.026 |
| H31b | 0.237221 | 1.004264 | 0.847052 | 0.026 |
| H32a | 0.019564 | 1.042335 | 0.826925 | 0.029 |
| H32b | 0.044647 | 1.155729 | 0.789338 | 0.029 |
| H34  | -0.07844 | 1.157561 | 0.568985 | 0.041 |
| H36a | 0.539716 | 0.460473 | 0.712792 | 0.04  |
| H36b | 0.687114 | 0.389038 | 0.74022  | 0.04  |
| H36c | 0.592454 | 0.563534 | 0.607567 | 0.042 |
| H36d | 0.536981 | 0.482641 | 0.684314 | 0.042 |
| H37a | 0.618877 | 0.444836 | 0.583849 | 0.079 |
| H37b | 0.610536 | 0.566367 | 0.569977 | 0.079 |
| H37c | 0.732119 | 0.336775 | 0.722646 | 0.035 |
| H37d | 0.730361 | 0.386274 | 0.617749 | 0.035 |
| H38a | 0.845491 | 0.381773 | 0.633278 | 0.057 |
| H38b | 0.808655 | 0.436998 | 0.530151 | 0.057 |
| H38c | 0.864369 | 0.417733 | 0.732796 | 0.057 |
| H38d | 0.924775 | 0.351869 | 0.668907 | 0.057 |
| H40  | 0.929024 | 0.652214 | 0.566385 | 0.053 |
| H40* | 0.876656 | 0.671191 | 0.517471 | 0.051 |
| H41a | 0.391047 | 0.91282  | 0.208825 | 0.077 |
| H41b | 0.371985 | 0.914712 | 0.305596 | 0.077 |
| H41c | 0.290311 | 0.868364 | 0.269431 | 0.077 |
| H42a | 0.458058 | 0.721126 | 0.367301 | 0.058 |
| H42b | 0.469513 | 0.715444 | 0.271517 | 0.058 |
| H43a | 0.693176 | 0.611184 | 0.311527 | 0.064 |
| H43b | 0.680159 | 0.631226 | 0.401781 | 0.064 |
| H44a | 0.830062 | 0.708227 | 0.262468 | 0.075 |
| H44b | 0.885838 | 0.605038 | 0.353366 | 0.075 |
| H44c | 0.816633 | 0.729029 | 0.352188 | 0.075 |

Table S8.4 . Bond Distances in Ru(biq)(bpy)(5-hexynenitrile)<sub>2</sub>[PF<sub>6</sub>]<sub>2</sub>, Å

|        |          |        |          |        |          |
|--------|----------|--------|----------|--------|----------|
| Ru1-N1 | 2.080(2) | Ru1-N2 | 2.073(2) | Ru1-N3 | 2.068(2) |
|--------|----------|--------|----------|--------|----------|

|           |          |           |          |           |          |
|-----------|----------|-----------|----------|-----------|----------|
| Ru1-N4    | 2.076(2) | Ru1-N5    | 2.027(2) | Ru1-N6    | 2.031(2) |
| N1-C1     | 1.379(3) | N1-C9     | 1.345(3) | N2-C10    | 1.348(3) |
| N2-C18    | 1.376(3) | N3-C24    | 1.366(3) | N3-C28    | 1.345(3) |
| N4-C19    | 1.346(3) | N4-C23    | 1.354(3) | N5-C29    | 1.137(3) |
| N6-C35    | 1.135(4) | C1-C2     | 1.412(4) | C1-C6     | 1.422(3) |
| C2-C3     | 1.368(4) | C3-C4     | 1.418(4) | C4-C5     | 1.357(4) |
| C5-C6     | 1.414(4) | C6-C7     | 1.406(4) | C7-C8     | 1.364(4) |
| C8-C9     | 1.404(3) | C9-C10    | 1.475(4) | C10-C11   | 1.414(4) |
| C11-C12   | 1.363(4) | C12-C13   | 1.412(4) | C13-C14   | 1.415(4) |
| C13-C18   | 1.423(4) | C14-C15   | 1.370(4) | C15-C16   | 1.408(4) |
| C16-C17   | 1.372(4) | C17-C18   | 1.414(3) | C19-C20   | 1.385(4) |
| C20-C21   | 1.369(5) | C21-C22   | 1.383(4) | C22-C23   | 1.391(4) |
| C23-C24   | 1.475(4) | C24-C25   | 1.381(4) | C25-C26   | 1.382(4) |
| C26-C27   | 1.381(4) | C27-C28   | 1.386(4) | C29-C30   | 1.464(4) |
| C30-C31   | 1.528(4) | C31-C32   | 1.531(4) | C32-C33   | 1.471(4) |
| C33-C34   | 1.182(4) | C35-C36   | 1.489(7) | C35-C36*  | 1.487(7) |
| C36-C37   | 1.561(8) | C36*-C37* | 1.562(7) | C37-C38   | 1.540(8) |
| C37*-C38* | 1.492(7) | C38-C39   | 1.473(7) | C38*-C39* | 1.476(7) |
| C39-C40   | 1.177(8) | C39*-C40* | 1.175(8) | P1-F1     | 1.591(2) |
| P1-F2     | 1.601(2) | P1-F3     | 1.583(2) | P1-F4     | 1.594(2) |
| P1-F5     | 1.593(2) | P1-F6     | 1.561(2) | P2-F7     | 1.594(2) |
| P2-F8     | 1.594(2) | P2-F9     | 1.595(2) | P2-F10    | 1.609(2) |
| P2-F11    | 1.596(2) | P2-F12    | 1.599(2) | O1-C42    | 1.429(4) |
| O1-C43    | 1.415(4) | C41-C42   | 1.483(5) | C43-C44   | 1.498(6) |

Table S8.5 . Bond Angles in Ru(biq)(bpy)(5-hexynenitrile)<sub>2</sub>[PF<sub>6</sub>]<sub>2</sub>, °

|            |            |            |            |            |            |
|------------|------------|------------|------------|------------|------------|
| N2-Ru1-N1  | 77.82(8)   | N2-Ru1-N4  | 96.21(8)   | N3-Ru1-N1  | 93.25(8)   |
| N3-Ru1-N2  | 88.84(8)   | N3-Ru1-N4  | 78.78(8)   | N4-Ru1-N1  | 170.23(8)  |
| N5-Ru1-N1  | 92.79(8)   | N5-Ru1-N2  | 95.96(8)   | N5-Ru1-N3  | 172.97(8)  |
| N5-Ru1-N4  | 95.55(8)   | N5-Ru1-N6  | 90.15(9)   | N6-Ru1-N1  | 96.60(8)   |
| N6-Ru1-N2  | 171.88(8)  | N6-Ru1-N3  | 85.57(9)   | N6-Ru1-N4  | 88.49(8)   |
| C1-N1-Ru1  | 129.67(16) | C9-N1-Ru1  | 111.12(16) | C9-N1-C1   | 118.8(2)   |
| C10-N2-Ru1 | 110.47(16) | C10-N2-C18 | 118.3(2)   | C18-N2-Ru1 | 130.53(16) |
| C24-N3-Ru1 | 115.26(17) | C28-N3-Ru1 | 126.14(18) | C28-N3-C24 | 118.2(2)   |
| C19-N4-Ru1 | 126.23(18) | C19-N4-C23 | 118.2(2)   | C23-N4-Ru1 | 115.47(17) |
| C29-N5-Ru1 | 174.1(2)   | C35-N6-Ru1 | 173.6(2)   | N1-C1-C2   | 120.6(2)   |
| N1-C1-C6   | 120.3(2)   | C2-C1-C6   | 119.0(2)   | C3-C2-C1   | 120.4(2)   |
| C2-C3-C4   | 120.6(3)   | C5-C4-C3   | 119.8(3)   | C4-C5-C6   | 121.2(3)   |
| C5-C6-C1   | 118.8(2)   | C7-C6-C1   | 118.7(2)   | C7-C6-C5   | 122.5(2)   |
| C8-C7-C6   | 120.0(2)   | C7-C8-C9   | 119.0(2)   | N1-C9-C8   | 122.7(2)   |
| N1-C9-C10  | 115.2(2)   | C8-C9-C10  | 121.9(2)   | N2-C10-C9  | 114.4(2)   |

|                |            |                |            |                |           |
|----------------|------------|----------------|------------|----------------|-----------|
| N2-C10-C11     | 122.3(2)   | C11-C10-C9     | 123.0(2)   | C12-C11-C10    | 119.2(2)  |
| C11-C12-C13    | 119.8(2)   | C12-C13-C14    | 122.3(2)   | C12-C13-C18    | 118.3(2)  |
| C14-C13-C18    | 119.4(2)   | C15-C14-C13    | 120.4(2)   | C14-C15-C16    | 119.9(3)  |
| C17-C16-C15    | 121.1(3)   | C16-C17-C18    | 120.1(2)   | N2-C18-C13     | 121.0(2)  |
| N2-C18-C17     | 120.1(2)   | C17-C18-C13    | 118.8(2)   | N4-C19-C20     | 122.3(3)  |
| C21-C20-C19    | 119.6(3)   | C20-C21-C22    | 118.9(3)   | C21-C22-C23    | 119.3(3)  |
| N4-C23-C22     | 121.7(3)   | N4-C23-C24     | 114.9(2)   | C22-C23-C24    | 123.4(3)  |
| N3-C24-C23     | 115.1(2)   | N3-C24-C25     | 121.5(2)   | C25-C24-C23    | 123.4(2)  |
| C24-C25-C26    | 119.7(3)   | C27-C26-C25    | 119.1(3)   | C26-C27-C28    | 118.9(3)  |
| N3-C28-C27     | 122.6(3)   | N5-C29-C30     | 177.1(3)   | C29-C30-C31    | 109.9(2)  |
| C30-C31-C32    | 111.9(2)   | C33-C32-C31    | 113.2(2)   | C34-C33-C32    | 179.4(3)  |
| N6-C35-C36     | 169.9(4)   | N6-C35-C36*    | 165.5(5)   | C35-C36-C37    | 111.9(6)  |
| C35-C36*-C37*  | 108.2(5)   | C38-C37-C36    | 115.3(7)   | C38*-C37*-C36* | 114.6(5)  |
| C39-C38-C37    | 112.7(9)   | C39*-C38*-C37* | 114.6(7)   | C40-C39-C38    | 175.2(19) |
| C40*-C39*-C38* | 174.6(15)  | F1-P1-F2       | 88.48(14)  | F1-P1-F4       | 88.19(12) |
| F1-P1-F5       | 89.90(13)  | F3-P1-F1       | 176.73(15) | F3-P1-F2       | 88.27(14) |
| F3-P1-F4       | 92.00(14)  | F3-P1-F5       | 89.70(14)  | F4-P1-F2       | 88.75(13) |
| F5-P1-F2       | 87.60(13)  | F5-P1-F4       | 175.92(15) | F6-P1-F1       | 89.53(16) |
| F6-P1-F2       | 177.71(18) | F6-P1-F3       | 93.72(17)  | F6-P1-F4       | 92.33(16) |
| F6-P1-F5       | 91.26(16)  | F7-P2-F8       | 90.60(13)  | F7-P2-F9       | 89.51(14) |
| F7-P2-F10      | 89.52(12)  | F7-P2-F11      | 178.38(13) | F7-P2-F12      | 89.47(12) |
| F8-P2-F9       | 89.80(15)  | F8-P2-F10      | 179.50(13) | F8-P2-F11      | 90.77(12) |
| F8-P2-F12      | 90.90(13)  | F9-P2-F10      | 89.72(13)  | F9-P2-F11      | 91.36(14) |
| F9-P2-F12      | 178.77(13) | F11-P2-F10     | 89.12(11)  | F11-P2-F12     | 89.64(13) |
| F12-P2-F10     | 89.58(10)  | C43-O1-C42     | 112.4(3)   | O1-C42-C41     | 108.9(3)  |
| O1-C43-C44     | 109.6(3)   |                |            |                |           |

## Figure S9 – Crystal Structure Determination of Ru(biq)<sub>2</sub>(4-pentynenitrile)<sub>2</sub>

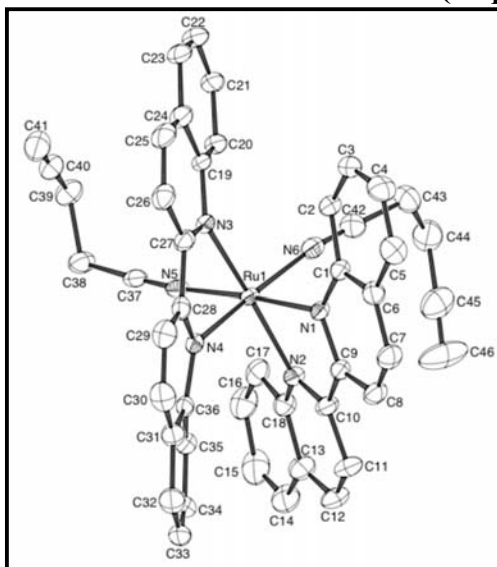

**Figure S9.1.** ORTEP drawing of the title compound with 50% probability thermal ellipsoids.

Ru(biq)<sub>2</sub>(4-pentynenitrile)<sub>2</sub>[PF<sub>6</sub>]<sub>2</sub>, C<sub>46</sub>H<sub>34</sub>N<sub>6</sub>P<sub>2</sub>F<sub>12</sub>Ru, crystallizes in the monoclinic space group P2<sub>1</sub>/c (systematic absences 0k0: k=odd and h0l: l=odd) with a=11.1852(6)Å, b=16.4112(10)Å, c=23.1159(13)Å, β=96.108(3)°, V=4219.1(4)Å<sup>3</sup>, Z=4, and d<sub>calc</sub>=1.672 g/cm<sup>3</sup>. X-ray intensity data were collected on a Bruker APEXII CCD area detector employing graphite-monochromated Mo-Kα radiation (λ=0.71073 Å) at a temperature of 100(1)K. Preliminary indexing was performed from a series of thirty-six 0.5° rotation frames with exposures of 10 seconds. A total of 2400 frames were collected with a crystal to detector distance of 37.5 mm, rotation widths of 0.5° and exposures of 30 seconds:

| scan type | 2θ     | ω      | φ      | χ     | frames |
|-----------|--------|--------|--------|-------|--------|
| φ         | -23.00 | 315.83 | 13.08  | 28.88 | 732    |
| φ         | 24.50  | 7.41   | 155.80 | 28.88 | 311    |
| φ         | 22.00  | 321.06 | 56.24  | 41.79 | 132    |
| φ         | -23.00 | 328.34 | 49.47  | 79.39 | 725    |
| φ         | -23.00 | 334.21 | 38.95  | 73.66 | 500    |

Rotation frames were integrated using SAINT<sup>i</sup>, producing a listing of unaveraged F<sup>2</sup> and s(F<sup>2</sup>) values which were then passed to the SHELXTL<sup>ii</sup> program package for further processing and structure solution. A total of 88028 reflections were measured over the ranges 1.52° ≤ 2θ ≤ 27.52°, -14° ≤ h ≤ 14, -18° ≤ k ≤ 21, -29° ≤ l ≤ 30 yielding 9685 unique reflections (R<sub>int</sub> = 0.0814). The intensity data were corrected for Lorentz and polarization effects and for absorption using SADABS<sup>iii</sup> (minimum and maximum transmission 0.6934, 0.7456).

The structure was solved by direct methods (SHELXS-97<sup>iv</sup>). Refinement was by full-matrix least squares based on F<sup>2</sup> using SHELXL-97.<sup>v</sup> All reflections were used during refinement. The weighting scheme used was w=1/[s<sup>2</sup>(F<sub>o</sub><sup>2</sup>) + (0.0744P)<sup>2</sup> + 16.0979P] where P = (F<sub>o</sub><sup>2</sup> + 2F<sub>c</sub><sup>2</sup>)/3. Non-hydrogen atoms were refined anisotropically and hydrogen atoms were refined using a riding model. Refinement converged to R<sub>1</sub>=0.0611 and wR<sub>2</sub>=0.1435 for 6260 observed reflections for which F > 4σ(F) and

R1=0.1070 and wR2=0.1676 and GOF =1.016 for all 9685 unique, non-zero reflections and 623 variables.<sup>vi</sup> The maximum D/s in the final cycle of least squares was 0.000 and the two most prominent peaks in the final difference Fourier were +1.577 and -1.362 e/Å<sup>3</sup>.

Table S9.1. lists cell information, data collection parameters, and refinement data. Final positional and equivalent isotropic thermal parameters are given in Tables S9.2. and S9.3. Anisotropic thermal parameters are in Table S9.4. Tables S9.5. and S9.6. list bond distances and bond angles. Figure S9.1. is an ORTEP<sup>vii</sup> representation of the molecule with 50% probability thermal ellipsoids displayed.

Table S9.1. Summary of Structure Determination of **Ru(biq)<sub>2</sub>(4-pentynenitrile)<sub>2</sub>[PF<sub>6</sub>]<sub>2</sub>**

|                                   |                                                                                  |
|-----------------------------------|----------------------------------------------------------------------------------|
| Empirical formula                 | C <sub>46</sub> H <sub>34</sub> N <sub>6</sub> P <sub>2</sub> F <sub>12</sub> Ru |
| Formula weight                    | 1061.80                                                                          |
| Temperature                       | 100(1) K                                                                         |
| Wavelength                        | 0.71073 Å                                                                        |
| Crystal system                    | monoclinic                                                                       |
| Space group                       | P2 <sub>1</sub> /c                                                               |
| Cell constants:                   |                                                                                  |
| a                                 | 11.1852(6) Å                                                                     |
| b                                 | 16.4112(10) Å                                                                    |
| c                                 | 23.1159(13) Å                                                                    |
| β                                 | 96.108(3)°                                                                       |
| Volume                            | 4219.1(4) Å <sup>3</sup>                                                         |
| Z                                 | 4                                                                                |
| Density (calculated)              | 1.672 Mg/m <sup>3</sup>                                                          |
| Absorption coefficient            | 0.545 mm <sup>-1</sup>                                                           |
| F(000)                            | 2136                                                                             |
| Crystal size                      | 0.10 x 0.06 x 0.04 mm <sup>3</sup>                                               |
| Theta range for data collection   | 1.52 to 27.52°                                                                   |
| Index ranges                      | -14 ≤ h ≤ 14, -18 ≤ k ≤ 21, -29 ≤ l ≤ 30                                         |
| Reflections collected             | 88028                                                                            |
| Independent reflections           | 9685 [R(int) = 0.0814]                                                           |
| Completeness to theta = 27.52°    | 99.8 %                                                                           |
| Absorption correction             | Semi-empirical from equivalents                                                  |
| Max. and min. transmission        | 0.7456 and 0.6934                                                                |
| Refinement method                 | Full-matrix least-squares on F <sup>2</sup>                                      |
| Data / restraints / parameters    | 9685 / 473 / 623                                                                 |
| Goodness-of-fit on F <sup>2</sup> | 1.016                                                                            |

Final R indices [ $I > 2\sigma(I)$ ]

R1 = 0.0611, wR2 = 0.1435

R indices (all data)

R1 = 0.1070, wR2 = 0.1676

Largest diff. peak and hole

1.577 and -1.362 e.Å<sup>-3</sup>

Table S9.2. Refined Positional Parameters

| Atom | x          | y          | z            | U <sub>eq</sub> , Å <sup>2</sup> |
|------|------------|------------|--------------|----------------------------------|
| Ru1  | 0.43347(3) | 0.24845(2) | 0.386782(14) | 0.01759(11)                      |
| N1   | 0.5386(3)  | 0.3165(2)  | 0.33467(15)  | 0.0202(8)                        |
| N2   | 0.3101(4)  | 0.2772(2)  | 0.31507(16)  | 0.0228(8)                        |
| N3   | 0.5735(4)  | 0.2142(2)  | 0.44927(16)  | 0.0221(8)                        |
| N4   | 0.5071(3)  | 0.1486(2)  | 0.34806(15)  | 0.0203(8)                        |
| N5   | 0.3318(3)  | 0.1740(2)  | 0.43330(16)  | 0.0213(8)                        |
| N6   | 0.3824(4)  | 0.3561(3)  | 0.42079(17)  | 0.0261(9)                        |
| C1   | 0.6514(4)  | 0.3488(3)  | 0.34970(19)  | 0.0225(10)                       |
| C2   | 0.6937(4)  | 0.3641(3)  | 0.4083(2)    | 0.0248(10)                       |
| C3   | 0.8053(5)  | 0.3956(3)  | 0.4223(2)    | 0.0295(11)                       |
| C4   | 0.8811(5)  | 0.4147(4)  | 0.3796(2)    | 0.0357(13)                       |
| C5   | 0.8417(5)  | 0.4033(3)  | 0.3224(2)    | 0.0327(12)                       |
| C6   | 0.7248(5)  | 0.3707(3)  | 0.3055(2)    | 0.0266(11)                       |
| C7   | 0.6772(5)  | 0.3639(3)  | 0.2467(2)    | 0.0309(12)                       |
| C8   | 0.5618(5)  | 0.3409(3)  | 0.2338(2)    | 0.0285(11)                       |
| C9   | 0.4920(4)  | 0.3173(3)  | 0.27847(19)  | 0.0228(10)                       |
| C10  | 0.3645(4)  | 0.2971(3)  | 0.26754(19)  | 0.0245(10)                       |
| C11  | 0.3007(5)  | 0.2999(3)  | 0.2115(2)    | 0.0321(12)                       |
| C12  | 0.1829(5)  | 0.2812(4)  | 0.2042(2)    | 0.0361(13)                       |
| C13  | 0.1222(5)  | 0.2622(3)  | 0.2529(2)    | 0.0348(13)                       |
| C14  | -0.0011(5) | 0.2405(4)  | 0.2473(3)    | 0.0412(14)                       |
| C15  | -0.0565(6) | 0.2255(4)  | 0.2957(3)    | 0.0489(17)                       |
| C16  | 0.0058(5)  | 0.2361(4)  | 0.3518(3)    | 0.0398(14)                       |
| C17  | 0.1260(5)  | 0.2547(3)  | 0.3583(2)    | 0.0306(11)                       |
| C18  | 0.1874(5)  | 0.2653(3)  | 0.3092(2)    | 0.0269(11)                       |
| C19  | 0.5921(5)  | 0.2386(3)  | 0.50720(19)  | 0.0251(11)                       |
| C20  | 0.4991(5)  | 0.2756(3)  | 0.5341(2)    | 0.0281(11)                       |
| C21  | 0.5189(6)  | 0.3002(3)  | 0.5916(2)    | 0.0354(13)                       |
| C22  | 0.6316(6)  | 0.2889(4)  | 0.6231(2)    | 0.0405(14)                       |
| C23  | 0.7210(5)  | 0.2512(4)  | 0.5989(2)    | 0.0378(13)                       |
| C24  | 0.7050(5)  | 0.2234(3)  | 0.5401(2)    | 0.0301(12)                       |
| C25  | 0.7952(5)  | 0.1822(3)  | 0.5136(2)    | 0.0342(13)                       |
| C26  | 0.7705(5)  | 0.1539(3)  | 0.4585(2)    | 0.0300(11)                       |
| C27  | 0.6576(4)  | 0.1707(3)  | 0.4270(2)    | 0.0237(10)                       |
| C28  | 0.6235(4)  | 0.1368(3)  | 0.3686(2)    | 0.0228(10)                       |
| C29  | 0.7030(5)  | 0.0944(3)  | 0.3368(2)    | 0.0307(12)                       |
| C30  | 0.6647(5)  | 0.0650(3)  | 0.2830(2)    | 0.0336(12)                       |
| C31  | 0.5435(5)  | 0.0720(3)  | 0.2616(2)    | 0.0275(11)                       |
| C32  | 0.4958(5)  | 0.0430(3)  | 0.2058(2)    | 0.0330(12)                       |
| C33  | 0.3772(5)  | 0.0488(3)  | 0.1882(2)    | 0.0334(13)                       |
| C34  | 0.2970(5)  | 0.0778(3)  | 0.2266(2)    | 0.0294(11)                       |
| C35  | 0.3391(4)  | 0.1066(3)  | 0.2804(2)    | 0.0246(10)                       |
| C36  | 0.4634(4)  | 0.1102(3)  | 0.29740(19)  | 0.0201(9)                        |
| C37  | 0.2863(4)  | 0.1324(3)  | 0.46329(19)  | 0.0237(10)                       |

|      |              |              |             |            |
|------|--------------|--------------|-------------|------------|
| C38  | 0.2305(5)    | 0.0803(3)    | 0.5044(2)   | 0.0313(12) |
| C39  | 0.2850(5)    | 0.0935(4)    | 0.5673(2)   | 0.0337(12) |
| C40  | 0.4137(5)    | 0.0701(3)    | 0.5779(2)   | 0.0330(12) |
| C41  | 0.5167(6)    | 0.0519(4)    | 0.5868(3)   | 0.0404(14) |
| C42  | 0.3573(5)    | 0.4198(3)    | 0.4331(2)   | 0.0318(12) |
| C43  | 0.3270(5)    | 0.5043(3)    | 0.4459(3)   | 0.0382(13) |
| C44  | 0.1966(6)    | 0.5252(4)    | 0.4242(3)   | 0.0451(15) |
| C45  | 0.1652(6)    | 0.5072(4)    | 0.3612(3)   | 0.0488(16) |
| C46  | 0.1360(6)    | 0.4918(6)    | 0.3139(3)   | 0.071(3)   |
| P1   | 0.04497(9)   | -0.02662(7)  | 0.36058(4)  | 0.0273(3)  |
| F1   | -0.08338(11) | -0.03106(13) | 0.33035(9)  | 0.0459(8)  |
| F2   | 0.00683(19)  | -0.07675(16) | 0.41132(8)  | 0.0902(17) |
| F3   | 0.17331(11)  | -0.02217(14) | 0.39082(9)  | 0.0518(9)  |
| F4   | 0.0831(2)    | 0.02352(16)  | 0.30985(8)  | 0.0783(14) |
| F5   | 0.07660(19)  | -0.10509(11) | 0.32988(11) | 0.0767(14) |
| F6   | 0.01333(19)  | 0.05186(11)  | 0.39128(11) | 0.0738(13) |
| P2   | 0.1192(3)    | 0.3523(2)    | 0.54759(15) | 0.0385(10) |
| F7   | 0.0511(5)    | 0.4311(2)    | 0.5306(3)   | 0.066(2)   |
| F8   | 0.1198(7)    | 0.3743(4)    | 0.61194(16) | 0.080(2)   |
| F9   | 0.1873(5)    | 0.2736(3)    | 0.5645(3)   | 0.082(2)   |
| F10  | 0.1186(6)    | 0.3303(4)    | 0.48324(16) | 0.088(2)   |
| F11  | -0.0003(4)   | 0.3076(3)    | 0.5494(3)   | 0.088(2)   |
| F12  | 0.2387(4)    | 0.3971(4)    | 0.5458(4)   | 0.076(2)   |
| P2'  | 0.1360(4)    | 0.3399(3)    | 0.55373(19) | 0.0432(12) |
| F7'  | 0.0374(6)    | 0.3805(4)    | 0.5126(3)   | 0.076(2)   |
| F8'  | 0.0964(8)    | 0.3891(6)    | 0.6046(3)   | 0.083(3)   |
| F9'  | 0.2346(5)    | 0.2993(4)    | 0.5949(3)   | 0.059(2)   |
| F10' | 0.1755(8)    | 0.2907(5)    | 0.5029(2)   | 0.091(3)   |
| F11' | 0.0486(6)    | 0.2719(5)    | 0.5660(4)   | 0.094(3)   |
| F12' | 0.2234(7)    | 0.4079(4)    | 0.5415(4)   | 0.084(2)   |

$$U_{eq} = 1/3[U_{11}(aa^*)^2 + U_{22}(bb^*)^2 + U_{33}(cc^*)^2 + 2U_{12}aa^*bb^*\cos\gamma + 2U_{13}aa^*cc^*\cos\beta + 2U_{23}bb^*cc^*\cos\alpha]$$

Table S9.3. Positional Parameters for Hydrogens

| Atom | x       | y      | z      | $U_{iso}, \text{\AA}^2$ |
|------|---------|--------|--------|-------------------------|
| H2   | 0.6451  | 0.3527 | 0.4375 | 0.033                   |
| H3   | 0.8322  | 0.4047 | 0.4612 | 0.039                   |
| H4   | 0.9579  | 0.4351 | 0.3903 | 0.047                   |
| H5   | 0.8914  | 0.4169 | 0.2940 | 0.043                   |
| H7   | 0.7250  | 0.3753 | 0.2171 | 0.041                   |
| H8   | 0.5280  | 0.3405 | 0.1953 | 0.038                   |
| H11  | 0.3401  | 0.3146 | 0.1796 | 0.043                   |
| H12  | 0.1415  | 0.2808 | 0.1671 | 0.048                   |
| H14  | -0.0439 | 0.2364 | 0.2107 | 0.055                   |
| H15  | -0.1361 | 0.2082 | 0.2920 | 0.065                   |
| H16  | -0.0352 | 0.2304 | 0.3845 | 0.053                   |
| H17  | 0.1666  | 0.2602 | 0.3953 | 0.041                   |
| H20  | 0.4242  | 0.2836 | 0.5133 | 0.037                   |
| H21  | 0.4570  | 0.3242 | 0.6094 | 0.047                   |
| H22  | 0.6450  | 0.3078 | 0.6611 | 0.054                   |
| H23  | 0.7946  | 0.2431 | 0.6209 | 0.050                   |
| H25  | 0.8709  | 0.1744 | 0.5336 | 0.045                   |

|      |        |        |        |       |
|------|--------|--------|--------|-------|
| H26  | 0.8275 | 0.1235 | 0.4414 | 0.040 |
| H29  | 0.7822 | 0.0863 | 0.3525 | 0.041 |
| H30  | 0.7189 | 0.0404 | 0.2605 | 0.045 |
| H32  | 0.5471 | 0.0198 | 0.1812 | 0.044 |
| H33  | 0.3481 | 0.0335 | 0.1506 | 0.044 |
| H34  | 0.2147 | 0.0773 | 0.2152 | 0.039 |
| H35  | 0.2852 | 0.1240 | 0.3059 | 0.033 |
| H38a | 0.2407 | 0.0236 | 0.4939 | 0.042 |
| H38b | 0.1450 | 0.0916 | 0.5015 | 0.042 |
| H39a | 0.2771 | 0.1506 | 0.5771 | 0.045 |
| H39b | 0.2396 | 0.0620 | 0.5929 | 0.045 |
| H41  | 0.5974 | 0.0377 | 0.5939 | 0.054 |
| H43a | 0.3803 | 0.5406 | 0.4277 | 0.051 |
| H43b | 0.3398 | 0.5130 | 0.4876 | 0.051 |
| H44a | 0.1435 | 0.4946 | 0.4466 | 0.060 |
| H44b | 0.1832 | 0.5827 | 0.4309 | 0.060 |
| H46  | 0.1121 | 0.4792 | 0.2751 | 0.095 |



Table S9.4. Refined Thermal Parameters (U's)

| Atom | U <sub>11</sub> | U <sub>22</sub> | U <sub>33</sub> | U <sub>23</sub> | U <sub>13</sub> | U <sub>12</sub> |
|------|-----------------|-----------------|-----------------|-----------------|-----------------|-----------------|
| Ru1  | 0.01999(18)     | 0.01973(18)     | 0.01259(16)     | 0.00107(15)     | -0.00037(11)    | 0.00058(17)     |
| N1   | 0.025(2)        | 0.019(2)        | 0.0158(18)      | 0.0021(15)      | -0.0002(15)     | 0.0025(16)      |
| N2   | 0.026(2)        | 0.022(2)        | 0.0186(18)      | 0.0004(15)      | -0.0029(16)     | 0.0017(17)      |
| N3   | 0.029(2)        | 0.020(2)        | 0.0169(18)      | 0.0037(15)      | -0.0021(16)     | -0.0041(17)     |
| N4   | 0.026(2)        | 0.018(2)        | 0.0169(18)      | 0.0034(15)      | 0.0026(15)      | -0.0003(16)     |
| N5   | 0.020(2)        | 0.027(2)        | 0.0163(18)      | -0.0008(16)     | -0.0016(15)     | -0.0045(17)     |
| N6   | 0.028(2)        | 0.030(2)        | 0.0197(19)      | 0.0034(17)      | 0.0005(16)      | -0.0006(19)     |
| C1   | 0.027(3)        | 0.020(2)        | 0.019(2)        | 0.0015(18)      | -0.0001(19)     | 0.003(2)        |
| C2   | 0.030(3)        | 0.025(3)        | 0.019(2)        | 0.0014(19)      | -0.0001(19)     | 0.001(2)        |
| C3   | 0.036(3)        | 0.028(3)        | 0.024(2)        | 0.000(2)        | -0.002(2)       | -0.006(2)       |
| C4   | 0.026(3)        | 0.041(3)        | 0.039(3)        | -0.002(2)       | 0.000(2)        | -0.011(2)       |
| C5   | 0.026(3)        | 0.036(3)        | 0.038(3)        | 0.000(2)        | 0.011(2)        | -0.004(2)       |
| C6   | 0.031(3)        | 0.024(3)        | 0.025(2)        | 0.000(2)        | 0.005(2)        | -0.002(2)       |
| C7   | 0.038(3)        | 0.033(3)        | 0.022(2)        | 0.002(2)        | 0.010(2)        | 0.001(2)        |
| C8   | 0.037(3)        | 0.030(3)        | 0.018(2)        | 0.002(2)        | 0.004(2)        | 0.004(2)        |
| C9   | 0.031(3)        | 0.019(2)        | 0.018(2)        | 0.0002(18)      | 0.0006(19)      | 0.003(2)        |
| C10  | 0.028(3)        | 0.027(3)        | 0.018(2)        | 0.0004(19)      | -0.0025(19)     | 0.004(2)        |
| C11  | 0.034(3)        | 0.042(3)        | 0.018(2)        | 0.001(2)        | -0.004(2)       | 0.003(2)        |
| C12  | 0.037(3)        | 0.042(3)        | 0.026(3)        | 0.003(2)        | -0.012(2)       | 0.003(3)        |
| C13  | 0.032(3)        | 0.035(3)        | 0.034(3)        | 0.003(2)        | -0.011(2)       | 0.006(2)        |
| C14  | 0.031(3)        | 0.041(4)        | 0.047(3)        | 0.007(3)        | -0.014(2)       | 0.001(3)        |
| C15  | 0.029(3)        | 0.042(4)        | 0.072(5)        | 0.015(3)        | -0.011(3)       | -0.003(3)       |
| C16  | 0.028(3)        | 0.043(4)        | 0.048(3)        | 0.011(3)        | 0.003(2)        | 0.006(2)        |
| C17  | 0.029(3)        | 0.029(3)        | 0.033(3)        | 0.005(2)        | 0.002(2)        | 0.010(2)        |
| C18  | 0.028(3)        | 0.025(3)        | 0.027(2)        | 0.0012(19)      | -0.002(2)       | 0.004(2)        |
| C19  | 0.034(3)        | 0.023(3)        | 0.016(2)        | 0.0049(18)      | -0.0065(18)     | -0.010(2)       |
| C20  | 0.038(3)        | 0.028(3)        | 0.018(2)        | 0.0014(19)      | -0.001(2)       | -0.007(2)       |
| C21  | 0.057(4)        | 0.031(3)        | 0.017(2)        | 0.002(2)        | 0.000(2)        | -0.013(3)       |
| C22  | 0.062(4)        | 0.039(3)        | 0.018(2)        | 0.002(2)        | -0.006(3)       | -0.011(3)       |
| C23  | 0.047(3)        | 0.037(3)        | 0.025(2)        | 0.008(3)        | -0.017(2)       | -0.015(3)       |
| C24  | 0.032(3)        | 0.031(3)        | 0.026(2)        | 0.006(2)        | -0.005(2)       | -0.004(2)       |
| C25  | 0.026(3)        | 0.038(3)        | 0.035(3)        | 0.012(2)        | -0.013(2)       | -0.003(2)       |
| C26  | 0.025(3)        | 0.029(3)        | 0.035(3)        | 0.007(2)        | -0.003(2)       | 0.002(2)        |
| C27  | 0.024(3)        | 0.026(3)        | 0.020(2)        | 0.0058(19)      | 0.0006(19)      | -0.004(2)       |
| C28  | 0.023(3)        | 0.018(2)        | 0.027(2)        | 0.0045(19)      | 0.0021(19)      | -0.002(2)       |
| C29  | 0.024(3)        | 0.031(3)        | 0.037(3)        | 0.004(2)        | 0.006(2)        | 0.007(2)        |
| C30  | 0.036(3)        | 0.030(3)        | 0.037(3)        | -0.002(2)       | 0.016(2)        | 0.004(2)        |
| C31  | 0.035(3)        | 0.026(3)        | 0.022(2)        | -0.001(2)       | 0.009(2)        | 0.000(2)        |
| C32  | 0.045(3)        | 0.031(3)        | 0.026(3)        | -0.004(2)       | 0.013(2)        | 0.001(2)        |
| C33  | 0.056(4)        | 0.025(3)        | 0.019(2)        | -0.001(2)       | 0.002(2)        | -0.008(3)       |
| C34  | 0.037(3)        | 0.024(3)        | 0.027(3)        | -0.004(2)       | -0.002(2)       | -0.001(2)       |
| C35  | 0.029(3)        | 0.022(2)        | 0.022(2)        | 0.0008(19)      | 0.0001(19)      | 0.002(2)        |
| C36  | 0.027(3)        | 0.016(2)        | 0.018(2)        | 0.0022(17)      | 0.0051(18)      | -0.0008(19)     |
| C37  | 0.026(3)        | 0.028(3)        | 0.016(2)        | -0.0033(19)     | -0.0025(18)     | 0.000(2)        |
| C38  | 0.032(3)        | 0.040(3)        | 0.022(2)        | 0.002(2)        | 0.001(2)        | -0.012(2)       |
| C39  | 0.037(3)        | 0.041(3)        | 0.024(2)        | 0.004(2)        | 0.009(2)        | 0.001(3)        |
| C40  | 0.041(3)        | 0.032(3)        | 0.025(3)        | 0.004(2)        | 0.005(2)        | -0.003(3)       |
| C41  | 0.040(4)        | 0.038(3)        | 0.043(3)        | 0.009(3)        | 0.001(3)        | -0.001(3)       |

|      |            |           |            |             |             |            |
|------|------------|-----------|------------|-------------|-------------|------------|
| C42  | 0.037(3)   | 0.031(3)  | 0.027(3)   | -0.002(2)   | 0.004(2)    | -0.001(2)  |
| C43  | 0.049(4)   | 0.028(3)  | 0.038(3)   | -0.005(2)   | 0.007(3)    | 0.000(3)   |
| C44  | 0.055(4)   | 0.042(4)  | 0.040(3)   | -0.001(3)   | 0.013(3)    | 0.005(3)   |
| C45  | 0.041(4)   | 0.065(5)  | 0.041(4)   | 0.010(3)    | 0.005(3)    | -0.005(3)  |
| C46  | 0.050(4)   | 0.141(8)  | 0.023(3)   | 0.009(4)    | 0.009(3)    | -0.036(5)  |
| P1   | 0.0267(7)  | 0.0305(7) | 0.0248(6)  | -0.0028(5)  | 0.0037(5)   | 0.0042(5)  |
| F1   | 0.0386(19) | 0.056(2)  | 0.0424(19) | -0.0058(16) | 0.0006(15)  | 0.0056(16) |
| F2   | 0.056(3)   | 0.132(4)  | 0.088(3)   | 0.076(3)    | 0.031(2)    | 0.039(3)   |
| F3   | 0.0381(19) | 0.069(3)  | 0.047(2)   | -0.0177(18) | -0.0042(15) | 0.0011(17) |
| F4   | 0.056(3)   | 0.119(4)  | 0.062(3)   | 0.041(3)    | 0.012(2)    | -0.011(3)  |
| F5   | 0.040(2)   | 0.071(3)  | 0.118(4)   | -0.056(3)   | -0.001(2)   | 0.014(2)   |
| F6   | 0.068(3)   | 0.066(3)  | 0.081(3)   | -0.042(2)   | -0.023(2)   | 0.025(2)   |
| P2   | 0.0371(18) | 0.053(2)  | 0.0251(17) | -0.0029(16) | 0.0000(14)  | 0.0079(15) |
| F7   | 0.066(4)   | 0.055(4)  | 0.078(5)   | 0.012(3)    | 0.004(4)    | 0.013(3)   |
| F8   | 0.102(6)   | 0.099(6)  | 0.035(3)   | -0.011(3)   | -0.004(3)   | 0.021(4)   |
| F9   | 0.109(5)   | 0.061(3)  | 0.074(5)   | 0.002(3)    | 0.004(4)    | 0.036(4)   |
| F10  | 0.130(7)   | 0.098(7)  | 0.036(3)   | -0.014(3)   | 0.006(3)    | 0.014(4)   |
| F11  | 0.071(4)   | 0.067(5)  | 0.126(7)   | -0.004(4)   | 0.013(4)    | -0.016(3)  |
| F12  | 0.049(3)   | 0.094(5)  | 0.086(6)   | 0.006(4)    | 0.008(3)    | 0.002(3)   |
| P2'  | 0.069(3)   | 0.031(2)  | 0.029(2)   | 0.0019(17)  | 0.003(2)    | 0.0073(18) |
| F7'  | 0.075(4)   | 0.082(5)  | 0.066(5)   | 0.009(4)    | -0.018(4)   | 0.022(4)   |
| F8'  | 0.095(7)   | 0.091(6)  | 0.065(4)   | -0.023(4)   | 0.015(4)    | 0.038(4)   |
| F9'  | 0.047(4)   | 0.076(6)  | 0.053(4)   | 0.020(4)    | 0.006(3)    | 0.011(4)   |
| F10' | 0.108(7)   | 0.110(7)  | 0.053(4)   | -0.036(4)   | 0.003(4)    | 0.038(4)   |
| F11' | 0.094(5)   | 0.100(5)  | 0.078(6)   | 0.032(4)    | -0.033(5)   | -0.048(5)  |
| F12' | 0.087(4)   | 0.073(5)  | 0.089(7)   | 0.036(4)    | 0.000(5)    | -0.017(4)  |

The form of the anisotropic displacement parameter is:

$$\exp[-2\pi^2(a^*{}^2U_{11}h^2+b^*{}^2U_{22}k^2+c^*{}^2U_{33}l^2+2b^*c^*U_{23}kl+2a^*c^*U_{13}hl+2a^*b^*U_{12}hk)]$$

Table S9.5. Bond Distances, Å

|          |          |          |           |         |           |
|----------|----------|----------|-----------|---------|-----------|
| Ru1-N6   | 2.039(4) | Ru1-N5   | 2.050(4)  | Ru1-N4  | 2.079(4)  |
| Ru1-N3   | 2.091(4) | Ru1-N1   | 2.093(4)  | Ru1-N2  | 2.095(4)  |
| N1-C9    | 1.347(6) | N1-C1    | 1.378(6)  | N2-C10  | 1.351(6)  |
| N2-C18   | 1.379(6) | N3-C27   | 1.328(6)  | N3-C19  | 1.392(6)  |
| N4-C28   | 1.351(6) | N4-C36   | 1.374(6)  | N5-C37  | 1.132(6)  |
| N6-C42   | 1.127(7) | C1-C2    | 1.410(6)  | C1-C6   | 1.424(6)  |
| C2-C3    | 1.357(7) | C3-C4    | 1.404(7)  | C4-C5   | 1.362(8)  |
| C5-C6    | 1.429(7) | C6-C7    | 1.409(7)  | C7-C8   | 1.347(7)  |
| C8-C9    | 1.413(6) | C9-C10   | 1.459(7)  | C10-C11 | 1.412(6)  |
| C11-C12  | 1.346(8) | C12-C13  | 1.408(8)  | C13-C14 | 1.417(8)  |
| C13-C18  | 1.425(7) | C14-C15  | 1.357(9)  | C15-C16 | 1.415(9)  |
| C16-C17  | 1.371(8) | C17-C18  | 1.398(7)  | C19-C20 | 1.407(7)  |
| C19-C24  | 1.425(7) | C20-C21  | 1.383(7)  | C21-C22 | 1.399(8)  |
| C22-C23  | 1.348(9) | C23-C24  | 1.426(7)  | C24-C25 | 1.409(8)  |
| C25-C26  | 1.356(7) | C26-C27  | 1.415(7)  | C27-C28 | 1.472(7)  |
| C28-C29  | 1.398(7) | C29-C30  | 1.361(8)  | C30-C31 | 1.397(8)  |
| C31-C32  | 1.426(7) | C31-C36  | 1.427(6)  | C32-C33 | 1.349(8)  |
| C33-C34  | 1.410(7) | C34-C35  | 1.368(7)  | C35-C36 | 1.405(7)  |
| C37-C38  | 1.466(7) | C38-C39  | 1.531(7)  | C39-C40 | 1.485(8)  |
| C40-C41  | 1.186(8) | C42-C43  | 1.465(8)  | C43-C44 | 1.530(9)  |
| C44-C45  | 1.489(9) | C45-C46  | 1.137(9)  | P1-F6   | 1.5299    |
| P1-F4    | 1.5300   | P1-F5    | 1.5300    | P1-F3   | 1.5300    |
| P1-F1    | 1.5300   | P1-F2    | 1.5300    | P2-F7'  | 1.244(7)  |
| P2-F8'   | 1.496(8) | P2-F12'  | 1.499(9)  | P2-F11  | 1.5299    |
| P2-F12   | 1.5300   | P2-F9    | 1.5300    | P2-F7   | 1.5301    |
| P2-F8    | 1.5301   | P2-F10   | 1.5301    | P2-F11' | 1.618(8)  |
| P2-F10'  | 1.621(8) | P2-F9'   | 1.821(7)  | F7-F7'  | 0.935(9)  |
| F7-P2'   | 1.822(7) | F8-P2'   | 1.488(7)  | F9-F9'  | 0.934(9)  |
| F9-P2'   | 1.244(7) | F9-F10'  | 1.446(9)  | F9-F11' | 1.556(10) |
| F10-F10' | 0.986(8) | F10-F7'  | 1.447(9)  | F10-P2' | 1.628(7)  |
| F11-F11' | 0.863(9) | F11-F7'  | 1.552(10) | F11-P2' | 1.608(8)  |
| F12-P2'  | 1.510(9) | P2'-F12' | 1.5299    | P2'-F8' | 1.5300    |
| P2'-F7'  | 1.5300   | P2'-F10' | 1.5300    | P2'-F9' | 1.5301    |
| P2'-F11' | 1.5301   |          |           |         |           |

Table S9.6. Bond Angles, °

|             |            |             |            |             |            |
|-------------|------------|-------------|------------|-------------|------------|
| N6-Ru1-N5   | 96.89(16)  | N6-Ru1-N4   | 171.36(16) | N5-Ru1-N4   | 91.35(15)  |
| N6-Ru1-N3   | 100.73(16) | N5-Ru1-N3   | 83.92(15)  | N4-Ru1-N3   | 77.51(15)  |
| N6-Ru1-N1   | 87.57(15)  | N5-Ru1-N1   | 175.32(15) | N4-Ru1-N1   | 84.25(15)  |
| N3-Ru1-N1   | 96.64(15)  | N6-Ru1-N2   | 85.51(16)  | N5-Ru1-N2   | 101.18(15) |
| N4-Ru1-N2   | 95.44(15)  | N3-Ru1-N2   | 171.49(15) | N1-Ru1-N2   | 77.72(15)  |
| C9-N1-C1    | 119.3(4)   | C9-N1-Ru1   | 112.1(3)   | C1-N1-Ru1   | 128.0(3)   |
| C10-N2-C18  | 119.0(4)   | C10-N2-Ru1  | 112.5(3)   | C18-N2-Ru1  | 127.6(3)   |
| C27-N3-C19  | 119.1(4)   | C27-N3-Ru1  | 112.7(3)   | C19-N3-Ru1  | 127.8(3)   |
| C28-N4-C36  | 118.4(4)   | C28-N4-Ru1  | 111.9(3)   | C36-N4-Ru1  | 127.4(3)   |
| C37-N5-Ru1  | 172.6(4)   | C42-N6-Ru1  | 171.2(4)   | N1-C1-C2    | 121.1(4)   |
| N1-C1-C6    | 119.9(4)   | C2-C1-C6    | 119.0(5)   | C3-C2-C1    | 120.2(5)   |
| C2-C3-C4    | 121.8(5)   | C5-C4-C3    | 119.7(5)   | C4-C5-C6    | 120.6(5)   |
| C7-C6-C1    | 119.0(5)   | C7-C6-C5    | 122.2(5)   | C1-C6-C5    | 118.6(4)   |
| C8-C7-C6    | 119.3(5)   | C7-C8-C9    | 120.4(5)   | N1-C9-C8    | 121.3(5)   |
| N1-C9-C10   | 115.8(4)   | C8-C9-C10   | 122.8(4)   | N2-C10-C11  | 121.8(5)   |
| N2-C10-C9   | 115.5(4)   | C11-C10-C9  | 122.7(4)   | C12-C11-C10 | 120.0(5)   |
| C11-C12-C13 | 120.0(5)   | C12-C13-C14 | 122.1(5)   | C12-C13-C18 | 118.6(5)   |
| C14-C13-C18 | 119.3(5)   | C15-C14-C13 | 119.8(6)   | C14-C15-C16 | 120.6(6)   |
| C17-C16-C15 | 120.6(6)   | C16-C17-C18 | 120.0(5)   | N2-C18-C17  | 120.6(4)   |
| N2-C18-C13  | 120.1(5)   | C17-C18-C13 | 119.3(5)   | N3-C19-C20  | 120.5(4)   |
| N3-C19-C24  | 119.8(5)   | C20-C19-C24 | 119.6(4)   | C21-C20-C19 | 120.0(5)   |
| C20-C21-C22 | 120.3(6)   | C23-C22-C21 | 120.8(5)   | C22-C23-C24 | 121.2(5)   |
| C25-C24-C19 | 119.1(5)   | C25-C24-C23 | 123.0(5)   | C19-C24-C23 | 117.9(5)   |
| C26-C25-C24 | 119.3(5)   | C25-C26-C27 | 119.8(5)   | N3-C27-C26  | 122.4(4)   |
| N3-C27-C28  | 115.6(4)   | C26-C27-C28 | 121.9(5)   | N4-C28-C29  | 121.9(4)   |
| N4-C28-C27  | 114.5(4)   | C29-C28-C27 | 123.5(5)   | C30-C29-C28 | 120.1(5)   |
| C29-C30-C31 | 119.5(5)   | C30-C31-C32 | 123.2(5)   | C30-C31-C36 | 118.5(4)   |
| C32-C31-C36 | 118.3(5)   | C33-C32-C31 | 120.7(5)   | C32-C33-C34 | 120.4(5)   |
| C35-C34-C33 | 120.6(5)   | C34-C35-C36 | 120.2(5)   | N4-C36-C35  | 120.6(4)   |
| N4-C36-C31  | 120.4(4)   | C35-C36-C31 | 119.0(4)   | N5-C37-C38  | 177.4(5)   |
| C37-C38-C39 | 112.2(4)   | C40-C39-C38 | 113.7(4)   | C41-C40-C39 | 179.3(7)   |
| N6-C42-C43  | 176.7(6)   | C42-C43-C44 | 112.3(5)   | C45-C44-C43 | 113.2(5)   |
| C46-C45-C44 | 176.6(7)   | F6-P1-F4    | 90.0       | F6-P1-F5    | 180.0      |
| F4-P1-F5    | 90.0       | F6-P1-F3    | 90.0       | F4-P1-F3    | 90.0       |
| F5-P1-F3    | 90.0       | F6-P1-F1    | 90.0       | F4-P1-F1    | 90.0       |
| F5-P1-F1    | 90.0       | F3-P1-F1    | 180.0      | F6-P1-F2    | 90.0       |
| F4-P1-F2    | 180.0      | F5-P1-F2    | 90.0       | F3-P1-F2    | 90.0       |
| F1-P1-F2    | 90.0       | F7'-P2-F8'  | 103.9(5)   | F7'-P2-F12' | 103.8(5)   |
| F8'-P2-F12' | 92.5(4)    | F7'-P2-F11  | 67.1(5)    | F8'-P2-F11  | 86.5(7)    |
| F12'-P2-F11 | 170.2(5)   | F7'-P2-F12  | 112.9(5)   | F8'-P2-F12  | 93.5(7)    |
| F12'-P2-F12 | 9.8(5)     | F11-P2-F12  | 180.0      | F7'-P2-F9   | 142.4(4)   |
| F8'-P2-F9   | 104.0(5)   | F12'-P2-F9  | 99.6(5)    | F11-P2-F9   | 90.0       |
| F12-P2-F9   | 90.0       | F7'-P2-F7   | 37.6(4)    | F8'-P2-F7   | 76.0(5)    |
| F12'-P2-F7  | 80.3(5)    | F11-P2-F7   | 90.0       | F12-P2-F7   | 90.0       |
| F9-P2-F7    | 180.0      | F7'-P2-F8   | 118.1(5)   | F8'-P2-F8   | 14.5(4)    |
| F12'-P2-F8  | 91.4(7)    | F11-P2-F8   | 90.0       | F12-P2-F8   | 90.0       |
| F9-P2-F8    | 90.0       | F7-P2-F8    | 90.0       | F7'-P2-F10  | 61.9(5)    |
| F8'-P2-F10  | 165.5(4)   | F12'-P2-F10 | 88.5(7)    | F11-P2-F10  | 90.0       |
| F12-P2-F10  | 90.0       | F9-P2-F10   | 90.0       | F7-P2-F10   | 90.0       |
| F8-P2-F10   | 180.0      | F7'-P2-F11' | 97.4(5)    | F8'-P2-F11' | 87.9(5)    |

|              |           |               |          |               |           |
|--------------|-----------|---------------|----------|---------------|-----------|
| F12'-P2-F11' | 158.1(5)  | F11-P2-F11'   | 31.7(3)  | F12-P2-F11'   | 148.3(3)  |
| F9-P2-F11'   | 59.1(4)   | F7-P2-F11'    | 120.9(4) | F8-P2-F11'    | 83.6(5)   |
| F10-P2-F11'  | 96.4(5)   | F7'-P2-F10'   | 97.2(4)  | F8'-P2-F10'   | 158.1(5)  |
| F12'-P2-F10' | 87.7(5)   | F11-P2-F10'   | 96.8(5)  | F12-P2-F10'   | 83.2(5)   |
| F9-P2-F10'   | 54.5(3)   | F7-P2-F10'    | 125.5(3) | F8-P2-F10'    | 143.7(3)  |
| F10-P2-F10'  | 36.3(3)   | F11'-P2-F10'  | 83.8(3)  | F7'-P2-F9'    | 173.2(5)  |
| F8'-P2-F9'   | 80.8(3)   | F12'-P2-F9'   | 80.7(3)  | F11-P2-F9'    | 108.7(4)  |
| F12-P2-F9'   | 71.3(4)   | F9-P2-F9'     | 30.8(4)  | F7-P2-F9'     | 149.2(4)  |
| F8-P2-F9'    | 66.4(4)   | F10-P2-F9'    | 113.6(4) | F11'-P2-F9'   | 77.7(3)   |
| F10'-P2-F9'  | 77.7(3)   | F7'-F7-P2     | 54.4(4)  | F7'-F7-P2'    | 57.1(4)   |
| P2-F7-P2'    | 2.7(2)    | P2'-F8-P2     | 11.4(3)  | F9'-F9-P2'    | 88.1(7)   |
| F9'-F9-F10'  | 129.6(10) | P2'-F9-F10'   | 68.9(4)  | F9'-F9-P2     | 92.1(6)   |
| P2'-F9-P2    | 4.0(3)    | F10'-F9-P2    | 65.9(3)  | F9'-F9-F11'   | 118.6(9)  |
| P2'-F9-F11'  | 65.2(4)   | F10'-F9-F11'  | 92.2(4)  | P2-F9-F11'    | 63.3(3)   |
| F10'-F10-F7' | 124.5(7)  | F10'-F10-P2   | 76.9(4)  | F7'-F10-P2    | 49.3(3)   |
| F10'-F10-P2' | 66.5(4)   | F7'-F10-P2'   | 59.3(3)  | P2-F10-P2'    | 10.4(2)   |
| F11'-F11-P2  | 79.8(6)   | F11'-F11-F7'  | 124.8(8) | P2-F11-F7'    | 47.6(3)   |
| F11'-F11-P2' | 69.1(5)   | P2-F11-P2'    | 10.7(3)  | F7'-F11-P2'   | 57.9(3)   |
| P2'-F12-P2   | 11.4(3)   | F9-P2'-F8     | 104.4(5) | F9-P2'-F12    | 103.2(5)  |
| F8-P2'-F12   | 92.4(4)   | F9-P2'-F12'   | 112.7(5) | F8-P2'-F12'   | 91.9(7)   |
| F12-P2'-F12' | 9.8(5)    | F9-P2'-F8'    | 118.2(4) | F8-P2'-F8'    | 14.5(4)   |
| F12-P2'-F8'  | 93.0(7)   | F12'-P2'-F8'  | 90.0     | F9-P2'-F7'    | 142.4(4)  |
| F8-P2'-F7'   | 104.3(4)  | F12-P2'-F7'   | 99.3(5)  | F12'-P2'-F7'  | 90.0      |
| F8'-P2'-F7'  | 90.0      | F9-P2'-F10'   | 61.8(4)  | F8-P2'-F10'   | 165.5(4)  |
| F12-P2'-F10' | 87.1(7)   | F12'-P2'-F10' | 90.0     | F8'-P2'-F10'  | 180.0     |
| F7'-P2'-F10' | 90.0      | F9-P2'-F9'    | 37.6(4)  | F8-P2'-F9'    | 75.7(4)   |
| F12-P2'-F9'  | 80.7(5)   | F12'-P2'-F9'  | 90.0     | F8'-P2'-F9'   | 90.0      |
| F7'-P2'-F9'  | 180.0     | F10'-P2'-F9'  | 90.0     | F9-P2'-F11'   | 67.3(5)   |
| F8-P2'-F11'  | 88.1(7)   | F12-P2'-F11'  | 170.2(5) | F12'-P2'-F11' | 180.0     |
| F8'-P2'-F11' | 90.0      | F7'-P2'-F11'  | 90.0     | F10'-P2'-F11' | 90.0      |
| F9'-P2'-F11' | 90.0      | F9-P2'-F11    | 97.9(5)  | F8-P2'-F11    | 88.6(5)   |
| F12-P2'-F11  | 157.9(5)  | F12'-P2'-F11  | 148.2(3) | F8'-P2'-F11   | 82.7(5)   |
| F7'-P2'-F11  | 59.2(3)   | F10'-P2'-F11  | 97.3(5)  | F9'-P2'-F11   | 120.7(3)  |
| F11'-P2'-F11 | 31.8(3)   | F9-P2'-F10    | 96.9(4)  | F8-P2'-F10    | 158.2(5)  |
| F12-P2'-F10  | 87.1(5)   | F12'-P2'-F10  | 84.0(5)  | F8'-P2'-F10   | 143.8(3)  |
| F7'-P2'-F10  | 54.4(3)   | F10'-P2'-F10  | 36.2(3)  | F9'-P2'-F10   | 125.6(3)  |
| F11'-P2'-F10 | 96.0(5)   | F11-P2'-F10   | 83.9(3)  | F9-P2'-F7     | 173.3(5)  |
| F8-P2'-F7    | 81.0(3)   | F12-P2'-F7    | 80.4(3)  | F12'-P2'-F7   | 70.7(4)   |
| F8'-P2'-F7   | 66.9(4)   | F7'-P2'-F7    | 30.9(4)  | F10'-P2'-F7   | 113.1(4)  |
| F9'-P2'-F7   | 149.1(4)  | F11'-P2'-F7   | 109.3(4) | F11-P2'-F7    | 78.0(3)   |
| F10-P2'-F7   | 77.5(3)   | F7-F7'-P2     | 88.0(7)  | F7-F7'-F10    | 129.3(10) |
| P2-F7'-F10   | 68.8(4)   | F7-F7'-P2'    | 92.1(6)  | P2-F7'-P2'    | 4.1(3)    |
| F10-F7'-P2'  | 66.2(3)   | F7-F7'-F11    | 118.8(9) | P2-F7'-F11    | 65.3(4)   |
| F10-F7'-F11  | 92.3(4)   | P2'-F7'-F11   | 62.9(3)  | P2-F8'-P2'    | 11.4(3)   |
| F9-F9'-P2'   | 54.3(4)   | F9-F9'-P2     | 57.1(4)  | P2'-F9'-P2    | 2.8(2)    |
| F10-F10'-F9  | 124.7(7)  | F10-F10'-P2'  | 77.3(5)  | F9-F10'-P2'   | 49.3(3)   |
| F10-F10'-P2  | 66.8(4)   | F9-F10'-P2    | 59.5(3)  | P2'-F10'-P2   | 10.5(2)   |
| F11-F11'-P2' | 79.1(6)   | F11-F11'-F9   | 124.4(8) | P2'-F11'-F9   | 47.5(3)   |
| F11-F11'-P2  | 68.5(5)   | P2'-F11'-P2   | 10.5(3)  | F9-F11'-P2    | 57.6(3)   |
| P2-F12'-P2'  | 11.4(3)   |               |          |               |           |

---

<sup>i</sup>Bruker (2009) SAINT. Bruker AXS Inc., Madison, Wisconsin, USA.

<sup>ii</sup>Bruker (2009) SHELXTL. Bruker AXS Inc., Madison, Wisconsin, USA.

<sup>iii</sup>Sheldrick, G.M. (2007) SADABS. University of Gottingen, Germany.

<sup>iv</sup>Sheldrick, G.M. (2008) Acta Cryst. A64,112-122.

<sup>v</sup>Sheldrick, G.M. (2008) Acta Cryst. A64,112-122.

<sup>vi</sup> $R1 = \Sigma ||F_o| - |F_c|| / \Sigma |F_o|$

$wR2 = [\Sigma w(F_o^2 - F_c^2)^2 / \Sigma w(F_o^2)^2]^{1/2}$

$GOF = [\Sigma w(F_o^2 - F_c^2)^2 / (n - p)]^{1/2}$

where n = the number of reflections and p = the number of parameters refined.

<sup>vii</sup>“ORTEP-II: A Fortran Thermal Ellipsoid Plot Program for Crystal Structure Illustrations”. C.K. Johnson (1976) ORNL-5138.
